# Supplementary material for: The lunar cycle drives migration of a nocturnal bird
Source: PLoS Biol. 2019 Oct 15;17(10):e3000456. doi: 10.1371/journal.pbio.3000456 (PMC6794068; doi:10.1371/journal.pbio.3000456)
Supplement: S2 Data — Contains 13 columns, “Timestamp,” “Acc[0]” to “Acc[10],” and “Id.” “Acc[0]” to “Acc[10]” correspond the number of sampling events per 5-minute run, and each row contains distributions of 12 runs during the preceding hour. See “Deployment and device settings” in the Materials and methods section for a detailed description of the sampling procedure and S4 Fig for an illustrative example. (XLSX) [file pbio.3000456.s002.xlsx]

## Sheet: S2_Data Raw activity data
Timestamp	Acc[0]	Acc[1]	Acc[2]	Acc[3]	Acc[4]	Acc[5]	Acc[6]	Acc[7]	Acc[8]	Acc[9]	Acc[10]	Id
2016-07-14 12:35:00	12	0	0	0	0	0	0	0	0	0	0	X500
2016-07-14 13:35:00	12	0	0	0	0	0	0	0	0	0	0	X500
2016-07-14 14:35:00	12	0	0	0	0	0	0	0	0	0	0	X500
2016-07-14 15:35:00	12	0	0	0	0	0	0	0	0	0	0	X500
2016-07-14 16:35:00	12	0	0	0	0	0	0	0	0	0	0	X500
2016-07-14 17:35:00	12	0	0	0	0	0	0	0	0	0	0	X500
2016-07-14 18:35:00	12	0	0	0	0	0	0	0	0	0	0	X500
2016-07-14 19:35:00	12	0	0	0	0	0	0	0	0	0	0	X500
2016-07-14 20:35:00	12	0	0	0	0	0	0	0	0	0	0	X500
2016-07-14 21:35:00	12	0	0	0	0	0	0	0	0	0	0	X500
2016-07-14 22:35:00	12	0	0	0	0	0	0	0	0	0	0	X500
2016-07-14 23:35:00	12	0	0	0	0	0	0	0	0	0	0	X500
2016-07-15 00:35:00	12	0	0	0	0	0	0	0	0	0	0	X500
2016-07-15 01:35:00	12	0	0	0	0	0	0	0	0	0	0	X500
2016-07-15 02:35:00	12	0	0	0	0	0	0	0	0	0	0	X500
2016-07-15 03:35:00	12	0	0	0	0	0	0	0	0	0	0	X500
2016-07-15 04:35:00	12	0	0	0	0	0	0	0	0	0	0	X500
2016-07-15 05:35:00	12	0	0	0	0	0	0	0	0	0	0	X500
2016-07-15 06:35:00	12	0	0	0	0	0	0	0	0	0	0	X500
2016-07-15 07:35:00	12	0	0	0	0	0	0	0	0	0	0	X500
2016-07-15 08:35:00	12	0	0	0	0	0	0	0	0	0	0	X500
2016-07-15 09:35:00	12	0	0	0	0	0	0	0	0	0	0	X500
2016-07-15 10:35:00	12	0	0	0	0	0	0	0	0	0	0	X500
2016-07-15 11:35:00	12	0	0	0	0	0	0	0	0	0	0	X500
2016-07-15 12:35:00	12	0	0	0	0	0	0	0	0	0	0	X500
2016-07-15 13:35:00	12	0	0	0	0	0	0	0	0	0	0	X500
2016-07-15 14:35:00	12	0	0	0	0	0	0	0	0	0	0	X500
2016-07-15 15:35:00	12	0	0	0	0	0	0	0	0	0	0	X500
2016-07-15 16:35:00	12	0	0	0	0	0	0	0	0	0	0	X500
2016-07-15 17:35:00	12	0	0	0	0	0	0	0	0	0	0	X500
2016-07-15 18:35:00	12	0	0	0	0	0	0	0	0	0	0	X500
2016-07-15 19:35:00	12	0	0	0	0	0	0	0	0	0	0	X500
2016-07-15 20:35:00	7	0	0	1	0	1	1	1	1	0	0	X500
2016-07-15 21:35:00	0	0	0	1	0	1	3	2	3	1	1	X500
2016-07-15 22:35:00	6	1	0	2	1	0	1	1	0	0	0	X500
2016-07-15 23:35:00	11	0	0	0	1	0	0	0	0	0	0	X500
2016-07-16 00:35:00	4	1	0	0	0	2	2	1	1	0	1	X500
2016-07-16 01:35:00	1	0	2	3	1	1	3	1	0	0	0	X500
2016-07-16 02:35:00	12	0	0	0	0	0	0	0	0	0	0	X500
2016-07-16 03:35:00	12	0	0	0	0	0	0	0	0	0	0	X500
2016-07-16 04:35:00	12	0	0	0	0	0	0	0	0	0	0	X500
2016-07-16 05:35:00	12	0	0	0	0	0	0	0	0	0	0	X500
2016-07-16 06:35:00	12	0	0	0	0	0	0	0	0	0	0	X500
2016-07-16 07:35:00	12	0	0	0	0	0	0	0	0	0	0	X500
2016-07-16 08:35:00	12	0	0	0	0	0	0	0	0	0	0	X500
2016-07-16 09:35:00	12	0	0	0	0	0	0	0	0	0	0	X500
2016-07-16 10:35:00	12	0	0	0	0	0	0	0	0	0	0	X500
2016-07-16 11:35:00	12	0	0	0	0	0	0	0	0	0	0	X500
2016-07-16 12:35:00	11	0	1	0	0	0	0	0	0	0	0	X500
2016-07-16 13:35:00	12	0	0	0	0	0	0	0	0	0	0	X500
2016-07-16 14:35:00	12	0	0	0	0	0	0	0	0	0	0	X500
2016-07-16 15:35:00	11	1	0	0	0	0	0	0	0	0	0	X500
2016-07-16 16:35:00	12	0	0	0	0	0	0	0	0	0	0	X500
2016-07-16 17:35:00	12	0	0	0	0	0	0	0	0	0	0	X500
2016-07-16 18:35:00	12	0	0	0	0	0	0	0	0	0	0	X500
2016-07-16 19:35:00	11	1	0	0	0	0	0	0	0	0	0	X500
2016-07-16 20:35:00	4	0	2	0	0	1	2	1	2	0	0	X500
2016-07-16 21:35:00	2	2	0	1	1	1	1	1	2	0	1	X500
2016-07-16 22:35:00	3	2	1	2	2	1	1	0	0	0	0	X500
2016-07-16 23:35:00	4	1	1	0	0	1	2	2	1	0	0	X500
2016-07-17 00:35:00	3	1	0	1	1	3	2	0	1	0	0	X500
2016-07-17 01:35:00	1	1	1	1	0	2	4	0	1	1	0	X500
2016-07-17 02:35:00	12	0	0	0	0	0	0	0	0	0	0	X500
2016-07-17 03:35:00	12	0	0	0	0	0	0	0	0	0	0	X500
2016-07-17 04:35:00	12	0	0	0	0	0	0	0	0	0	0	X500
2016-07-17 05:35:00	12	0	0	0	0	0	0	0	0	0	0	X500
2016-07-17 06:35:00	12	0	0	0	0	0	0	0	0	0	0	X500
2016-07-17 07:35:00	12	0	0	0	0	0	0	0	0	0	0	X500
2016-07-17 08:35:00	12	0	0	0	0	0	0	0	0	0	0	X500
2016-07-17 09:35:00	11	1	0	0	0	0	0	0	0	0	0	X500
2016-07-17 10:35:00	12	0	0	0	0	0	0	0	0	0	0	X500
2016-07-17 11:35:00	11	1	0	0	0	0	0	0	0	0	0	X500
2016-07-17 12:35:00	12	0	0	0	0	0	0	0	0	0	0	X500
2016-07-17 13:35:00	12	0	0	0	0	0	0	0	0	0	0	X500
2016-07-17 14:35:00	12	0	0	0	0	0	0	0	0	0	0	X500
2016-07-17 15:35:00	12	0	0	0	0	0	0	0	0	0	0	X500
2016-07-17 16:35:00	12	0	0	0	0	0	0	0	0	0	0	X500
2016-07-17 17:35:00	12	0	0	0	0	0	0	0	0	0	0	X500
2016-07-17 18:35:00	12	0	0	0	0	0	0	0	0	0	0	X500
2016-07-17 19:35:00	12	0	0	0	0	0	0	0	0	0	0	X500
2016-07-17 20:35:00	4	0	0	0	1	2	0	0	2	3	0	X500
2016-07-17 21:35:00	2	0	1	0	2	2	3	2	0	0	0	X500
2016-07-17 22:35:00	4	2	3	0	0	1	0	1	0	0	1	X500
2016-07-17 23:35:00	5	1	1	2	0	1	1	0	1	0	0	X500
2016-07-18 00:35:00	2	1	1	0	1	3	3	0	1	0	0	X500
2016-07-18 01:35:00	2	0	0	0	0	3	2	3	1	1	0	X500
2016-07-18 02:35:00	12	0	0	0	0	0	0	0	0	0	0	X500
2016-07-18 03:35:00	12	0	0	0	0	0	0	0	0	0	0	X500
2016-07-18 04:35:00	12	0	0	0	0	0	0	0	0	0	0	X500
2016-07-18 05:35:00	12	0	0	0	0	0	0	0	0	0	0	X500
2016-07-18 06:35:00	12	0	0	0	0	0	0	0	0	0	0	X500
2016-07-18 07:35:00	12	0	0	0	0	0	0	0	0	0	0	X500
2016-07-18 08:35:00	12	0	0	0	0	0	0	0	0	0	0	X500
2016-07-18 09:35:00	12	0	0	0	0	0	0	0	0	0	0	X500
2016-07-18 10:35:00	12	0	0	0	0	0	0	0	0	0	0	X500
2016-07-18 11:35:00	12	0	0	0	0	0	0	0	0	0	0	X500
2016-07-18 12:35:00	12	0	0	0	0	0	0	0	0	0	0	X500
2016-07-18 13:35:00	12	0	0	0	0	0	0	0	0	0	0	X500
2016-07-18 14:35:00	12	0	0	0	0	0	0	0	0	0	0	X500
2016-07-18 15:35:00	10	2	0	0	0	0	0	0	0	0	0	X500
2016-07-18 16:35:00	12	0	0	0	0	0	0	0	0	0	0	X500
2016-07-18 17:35:00	12	0	0	0	0	0	0	0	0	0	0	X500
2016-07-18 18:35:00	12	0	0	0	0	0	0	0	0	0	0	X500
2016-07-18 19:35:00	12	0	0	0	0	0	0	0	0	0	0	X500
2016-07-18 20:35:00	5	1	2	0	0	1	0	3	0	0	0	X500
2016-07-18 21:35:00	0	0	2	0	1	3	2	4	0	0	0	X500
2016-07-18 22:35:00	6	1	1	1	0	1	2	0	0	0	0	X500
2016-07-18 23:35:00	2	0	1	3	1	1	1	2	0	0	1	X500
2016-07-19 00:35:00	4	2	0	1	1	2	0	0	1	1	0	X500
2016-07-19 01:35:00	0	0	0	1	1	2	1	2	2	0	3	X500
2016-07-19 02:35:00	12	0	0	0	0	0	0	0	0	0	0	X500
2016-07-19 03:35:00	12	0	0	0	0	0	0	0	0	0	0	X500
2016-07-19 04:35:00	12	0	0	0	0	0	0	0	0	0	0	X500
2016-07-19 05:35:00	12	0	0	0	0	0	0	0	0	0	0	X500
2016-07-19 06:35:00	10	1	1	0	0	0	0	0	0	0	0	X500
2016-07-19 07:35:00	12	0	0	0	0	0	0	0	0	0	0	X500
2016-07-19 08:35:00	12	0	0	0	0	0	0	0	0	0	0	X500
2016-07-19 09:35:00	12	0	0	0	0	0	0	0	0	0	0	X500
2016-07-19 10:35:00	11	1	0	0	0	0	0	0	0	0	0	X500
2016-07-19 11:35:00	11	1	0	0	0	0	0	0	0	0	0	X500
2016-07-19 12:35:00	12	0	0	0	0	0	0	0	0	0	0	X500
2016-07-19 13:35:00	12	0	0	0	0	0	0	0	0	0	0	X500
2016-07-19 14:35:00	11	1	0	0	0	0	0	0	0	0	0	X500
2016-07-19 15:35:00	12	0	0	0	0	0	0	0	0	0	0	X500
2016-07-19 16:35:00	12	0	0	0	0	0	0	0	0	0	0	X500
2016-07-19 17:35:00	10	0	2	0	0	0	0	0	0	0	0	X500
2016-07-19 18:35:00	12	0	0	0	0	0	0	0	0	0	0	X500
2016-07-19 19:35:00	12	0	0	0	0	0	0	0	0	0	0	X500
2016-07-19 20:35:00	4	0	0	2	0	1	0	1	1	2	1	X500
2016-07-19 21:35:00	0	0	0	0	0	4	2	4	1	1	0	X500
2016-07-19 22:35:00	0	0	0	0	2	4	1	3	1	1	0	X500
2016-07-19 23:35:00	1	2	0	1	3	0	1	2	2	0	0	X500
2016-07-20 00:35:00	0	0	1	0	0	2	0	1	3	4	1	X500
2016-07-20 01:35:00	0	0	0	1	0	3	0	3	2	2	1	X500
2016-07-20 02:35:00	8	0	0	1	2	1	0	0	0	0	0	X500
2016-07-20 03:35:00	11	0	0	1	0	0	0	0	0	0	0	X500
2016-07-20 04:35:00	12	0	0	0	0	0	0	0	0	0	0	X500
2016-07-20 05:35:00	11	0	1	0	0	0	0	0	0	0	0	X500
2016-07-20 06:35:00	10	1	1	0	0	0	0	0	0	0	0	X500
2016-07-20 07:35:00	10	2	0	0	0	0	0	0	0	0	0	X500
2016-07-20 08:35:00	10	1	0	1	0	0	0	0	0	0	0	X500
2016-07-20 09:35:00	12	0	0	0	0	0	0	0	0	0	0	X500
2016-07-20 10:35:00	12	0	0	0	0	0	0	0	0	0	0	X500
2016-07-20 11:35:00	12	0	0	0	0	0	0	0	0	0	0	X500
2016-07-20 12:35:00	12	0	0	0	0	0	0	0	0	0	0	X500
2016-07-20 13:35:00	12	0	0	0	0	0	0	0	0	0	0	X500
2016-07-20 14:35:00	11	1	0	0	0	0	0	0	0	0	0	X500
2016-07-20 15:35:00	8	2	1	0	0	0	1	0	0	0	0	X500
2016-07-20 16:35:00	12	0	0	0	0	0	0	0	0	0	0	X500
2016-07-20 17:35:00	9	1	1	0	1	0	0	0	0	0	0	X500
2016-07-20 18:35:00	10	1	0	0	1	0	0	0	0	0	0	X500
2016-07-20 19:35:00	10	1	1	0	0	0	0	0	0	0	0	X500
2016-07-20 20:35:00	1	0	1	1	3	2	1	1	0	1	1	X500
2016-07-20 21:35:00	0	0	3	1	0	3	1	1	2	1	0	X500
2016-07-20 22:35:00	1	2	0	0	4	2	2	1	0	0	0	X500
2016-07-20 23:35:00	0	1	4	1	1	1	0	0	4	0	0	X500
2016-07-21 00:35:00	2	0	3	3	0	1	0	1	1	1	0	X500
2016-07-21 01:35:00	0	0	0	0	0	3	5	3	1	0	0	X500
2016-07-21 02:35:00	9	1	1	0	1	0	0	0	0	0	0	X500
2016-07-21 03:35:00	11	1	0	0	0	0	0	0	0	0	0	X500
2016-07-21 04:35:00	11	1	0	0	0	0	0	0	0	0	0	X500
2016-07-21 05:35:00	12	0	0	0	0	0	0	0	0	0	0	X500
2016-07-21 06:35:00	12	0	0	0	0	0	0	0	0	0	0	X500
2016-07-21 07:35:00	11	1	0	0	0	0	0	0	0	0	0	X500
2016-07-21 08:35:00	12	0	0	0	0	0	0	0	0	0	0	X500
2016-07-21 09:35:00	10	2	0	0	0	0	0	0	0	0	0	X500
2016-07-21 10:35:00	12	0	0	0	0	0	0	0	0	0	0	X500
2016-07-21 11:35:00	12	0	0	0	0	0	0	0	0	0	0	X500
2016-07-21 12:35:00	11	1	0	0	0	0	0	0	0	0	0	X500
2016-07-21 13:35:00	11	1	0	0	0	0	0	0	0	0	0	X500
2016-07-21 14:35:00	12	0	0	0	0	0	0	0	0	0	0	X500
2016-07-21 15:35:00	11	1	0	0	0	0	0	0	0	0	0	X500
2016-07-21 16:35:00	12	0	0	0	0	0	0	0	0	0	0	X500
2016-07-21 17:35:00	12	0	0	0	0	0	0	0	0	0	0	X500
2016-07-21 18:35:00	12	0	0	0	0	0	0	0	0	0	0	X500
2016-07-21 19:35:00	12	0	0	0	0	0	0	0	0	0	0	X500
2016-07-21 20:35:00	0	3	1	0	2	1	2	1	0	2	0	X500
2016-07-21 21:35:00	2	0	3	0	2	1	2	1	0	0	1	X500
2016-07-21 22:35:00	6	2	1	0	1	0	0	0	0	1	1	X500
2016-07-21 23:35:00	2	0	0	2	3	2	2	1	0	0	0	X500
2016-07-22 00:35:00	2	1	1	1	1	3	0	1	2	0	0	X500
2016-07-22 01:35:00	3	0	0	1	2	0	2	3	0	0	1	X500
2016-07-22 02:35:00	10	1	0	0	0	0	1	0	0	0	0	X500
2016-07-22 03:35:00	12	0	0	0	0	0	0	0	0	0	0	X500
2016-07-22 04:35:00	9	2	1	0	0	0	0	0	0	0	0	X500
2016-07-22 05:35:00	12	0	0	0	0	0	0	0	0	0	0	X500
2016-07-22 06:35:00	12	0	0	0	0	0	0	0	0	0	0	X500
2016-07-22 07:35:00	12	0	0	0	0	0	0	0	0	0	0	X500
2016-07-22 08:35:00	12	0	0	0	0	0	0	0	0	0	0	X500
2016-07-22 09:35:00	12	0	0	0	0	0	0	0	0	0	0	X500
2016-07-22 10:35:00	12	0	0	0	0	0	0	0	0	0	0	X500
2016-07-22 11:35:00	12	0	0	0	0	0	0	0	0	0	0	X500
2016-07-22 12:35:00	11	1	0	0	0	0	0	0	0	0	0	X500
2016-07-22 13:35:00	12	0	0	0	0	0	0	0	0	0	0	X500
2016-07-22 14:35:00	12	0	0	0	0	0	0	0	0	0	0	X500
2016-07-22 15:35:00	12	0	0	0	0	0	0	0	0	0	0	X500
2016-07-22 16:35:00	10	2	0	0	0	0	0	0	0	0	0	X500
2016-07-22 17:35:00	12	0	0	0	0	0	0	0	0	0	0	X500
2016-07-22 18:35:00	12	0	0	0	0	0	0	0	0	0	0	X500
2016-07-22 19:35:00	10	2	0	0	0	0	0	0	0	0	0	X500
2016-07-22 20:35:00	1	2	0	0	1	3	4	1	0	0	0	X500
2016-07-22 21:35:00	2	1	1	1	1	2	0	0	3	1	0	X500
2016-07-22 22:35:00	1	0	2	1	2	1	1	2	0	1	1	X500
2016-07-22 23:35:00	3	2	1	1	2	1	1	1	0	0	0	X500
2016-07-23 00:35:00	1	2	0	2	3	2	2	0	0	0	0	X500
2016-07-23 01:35:00	0	0	0	0	1	1	2	3	1	1	3	X500
2016-07-23 02:35:00	8	1	1	0	0	0	0	1	0	0	1	X500
2016-07-23 03:35:00	12	0	0	0	0	0	0	0	0	0	0	X500
2016-07-23 04:35:00	10	1	0	1	0	0	0	0	0	0	0	X500
2016-07-23 05:35:00	11	1	0	0	0	0	0	0	0	0	0	X500
2016-07-23 06:35:00	12	0	0	0	0	0	0	0	0	0	0	X500
2016-07-23 07:35:00	12	0	0	0	0	0	0	0	0	0	0	X500
2016-07-23 08:35:00	12	0	0	0	0	0	0	0	0	0	0	X500
2016-07-23 09:35:00	12	0	0	0	0	0	0	0	0	0	0	X500
2016-07-23 10:35:00	12	0	0	0	0	0	0	0	0	0	0	X500
2016-07-23 11:35:00	11	1	0	0	0	0	0	0	0	0	0	X500
2016-07-23 12:35:00	12	0	0	0	0	0	0	0	0	0	0	X500
2016-07-23 13:35:00	12	0	0	0	0	0	0	0	0	0	0	X500
2016-07-23 14:35:00	12	0	0	0	0	0	0	0	0	0	0	X500
2016-07-23 15:35:00	12	0	0	0	0	0	0	0	0	0	0	X500
2016-07-23 16:35:00	10	2	0	0	0	0	0	0	0	0	0	X500
2016-07-23 17:35:00	12	0	0	0	0	0	0	0	0	0	0	X500
2016-07-23 18:35:00	12	0	0	0	0	0	0	0	0	0	0	X500
2016-07-23 19:35:00	12	0	0	0	0	0	0	0	0	0	0	X500
2016-07-23 20:35:00	2	2	0	2	0	1	1	1	2	0	1	X500
2016-07-23 21:35:00	2	0	1	4	0	0	0	3	0	2	0	X500
2016-07-23 22:35:00	7	2	2	0	0	0	1	0	0	0	0	X500
2016-07-23 23:35:00	6	1	1	0	0	0	1	1	2	0	0	X500
2016-07-24 00:35:00	2	4	1	1	1	1	0	1	0	1	0	X500
2016-07-24 01:35:00	1	0	0	3	0	2	2	2	0	0	2	X500
2016-07-24 02:35:00	9	0	0	1	0	0	0	0	0	1	1	X500
2016-07-24 03:35:00	12	0	0	0	0	0	0	0	0	0	0	X500
2016-07-24 04:35:00	11	0	1	0	0	0	0	0	0	0	0	X500
2016-07-24 05:35:00	11	1	0	0	0	0	0	0	0	0	0	X500
2016-07-24 06:35:00	12	0	0	0	0	0	0	0	0	0	0	X500
2016-07-24 07:35:00	12	0	0	0	0	0	0	0	0	0	0	X500
2016-07-24 08:35:00	12	0	0	0	0	0	0	0	0	0	0	X500
2016-07-24 09:35:00	12	0	0	0	0	0	0	0	0	0	0	X500
2016-07-24 10:35:00	11	0	1	0	0	0	0	0	0	0	0	X500
2016-07-24 11:35:00	12	0	0	0	0	0	0	0	0	0	0	X500
2016-07-24 12:35:00	12	0	0	0	0	0	0	0	0	0	0	X500
2016-07-24 13:35:00	12	0	0	0	0	0	0	0	0	0	0	X500
2016-07-24 14:35:00	12	0	0	0	0	0	0	0	0	0	0	X500
2016-07-24 15:35:00	12	0	0	0	0	0	0	0	0	0	0	X500
2016-07-24 16:35:00	11	0	1	0	0	0	0	0	0	0	0	X500
2016-07-24 17:35:00	12	0	0	0	0	0	0	0	0	0	0	X500
2016-07-24 18:35:00	11	0	1	0	0	0	0	0	0	0	0	X500
2016-07-24 19:35:00	10	2	0	0	0	0	0	0	0	0	0	X500
2016-07-24 20:35:00	2	0	0	3	3	0	0	2	1	0	1	X500
2016-07-24 21:35:00	3	2	1	2	1	0	1	2	0	0	0	X500
2016-07-24 22:35:00	9	2	0	0	0	0	1	0	0	0	0	X500
2016-07-24 23:35:00	4	2	3	0	0	1	1	0	0	1	0	X500
2016-07-25 00:35:00	2	3	0	0	1	3	1	0	2	0	0	X500
2016-07-25 01:35:00	0	0	1	3	2	2	0	2	1	0	1	X500
2016-07-25 02:35:00	9	0	1	0	0	1	1	0	0	0	0	X500
2016-07-25 03:35:00	12	0	0	0	0	0	0	0	0	0	0	X500
2016-07-25 04:35:00	11	1	0	0	0	0	0	0	0	0	0	X500
2016-07-25 05:35:00	12	0	0	0	0	0	0	0	0	0	0	X500
2016-07-25 06:35:00	12	0	0	0	0	0	0	0	0	0	0	X500
2016-07-25 07:35:00	12	0	0	0	0	0	0	0	0	0	0	X500
2016-07-25 08:35:00	11	1	0	0	0	0	0	0	0	0	0	X500
2016-07-25 09:35:00	12	0	0	0	0	0	0	0	0	0	0	X500
2016-07-25 10:35:00	12	0	0	0	0	0	0	0	0	0	0	X500
2016-07-25 11:35:00	12	0	0	0	0	0	0	0	0	0	0	X500
2016-07-25 12:35:00	12	0	0	0	0	0	0	0	0	0	0	X500
2016-07-25 13:35:00	12	0	0	0	0	0	0	0	0	0	0	X500
2016-07-25 14:35:00	12	0	0	0	0	0	0	0	0	0	0	X500
2016-07-25 15:35:00	12	0	0	0	0	0	0	0	0	0	0	X500
2016-07-25 16:35:00	12	0	0	0	0	0	0	0	0	0	0	X500
2016-07-25 17:35:00	12	0	0	0	0	0	0	0	0	0	0	X500
2016-07-25 18:35:00	12	0	0	0	0	0	0	0	0	0	0	X500
2016-07-25 19:35:00	11	1	0	0	0	0	0	0	0	0	0	X500
2016-07-25 20:35:00	0	1	1	1	0	3	0	2	3	0	1	X500
2016-07-25 21:35:00	5	4	2	1	0	0	0	0	0	0	0	X500
2016-07-25 22:35:00	11	0	0	0	0	0	0	1	0	0	0	X500
2016-07-25 23:35:00	9	0	1	1	0	1	0	0	0	0	0	X500
2016-07-26 00:35:00	5	4	0	1	0	0	2	0	0	0	0	X500
2016-07-26 01:35:00	1	2	1	1	2	2	1	0	0	1	1	X500
2016-07-26 02:35:00	8	1	0	0	1	1	0	0	1	0	0	X500
2016-07-26 03:35:00	12	0	0	0	0	0	0	0	0	0	0	X500
2016-07-26 04:35:00	12	0	0	0	0	0	0	0	0	0	0	X500
2016-07-26 05:35:00	11	1	0	0	0	0	0	0	0	0	0	X500
2016-07-26 06:35:00	11	1	0	0	0	0	0	0	0	0	0	X500
2016-07-26 07:35:00	12	0	0	0	0	0	0	0	0	0	0	X500
2016-07-26 08:35:00	12	0	0	0	0	0	0	0	0	0	0	X500
2016-07-26 09:35:00	12	0	0	0	0	0	0	0	0	0	0	X500
2016-07-26 10:35:00	11	1	0	0	0	0	0	0	0	0	0	X500
2016-07-26 11:35:00	12	0	0	0	0	0	0	0	0	0	0	X500
2016-07-26 12:35:00	12	0	0	0	0	0	0	0	0	0	0	X500
2016-07-26 13:35:00	12	0	0	0	0	0	0	0	0	0	0	X500
2016-07-26 14:35:00	11	1	0	0	0	0	0	0	0	0	0	X500
2016-07-26 15:35:00	12	0	0	0	0	0	0	0	0	0	0	X500
2016-07-26 16:35:00	12	0	0	0	0	0	0	0	0	0	0	X500
2016-07-26 17:35:00	11	0	1	0	0	0	0	0	0	0	0	X500
2016-07-26 18:35:00	12	0	0	0	0	0	0	0	0	0	0	X500
2016-07-26 19:35:00	12	0	0	0	0	0	0	0	0	0	0	X500
2016-07-26 20:35:00	1	1	0	2	0	1	2	2	2	0	1	X500
2016-07-26 21:35:00	6	4	0	2	0	0	0	0	0	0	0	X500
2016-07-26 22:35:00	9	3	0	0	0	0	0	0	0	0	0	X500
2016-07-26 23:35:00	11	1	0	0	0	0	0	0	0	0	0	X500
2016-07-27 00:35:00	4	4	1	0	0	1	1	1	0	0	0	X500
2016-07-27 01:35:00	1	3	0	0	1	2	2	1	0	1	1	X500
2016-07-27 02:35:00	8	1	0	0	1	1	0	0	1	0	0	X500
2016-07-27 03:35:00	12	0	0	0	0	0	0	0	0	0	0	X500
2016-07-27 04:35:00	12	0	0	0	0	0	0	0	0	0	0	X500
2016-07-27 05:35:00	12	0	0	0	0	0	0	0	0	0	0	X500
2016-07-27 06:35:00	12	0	0	0	0	0	0	0	0	0	0	X500
2016-07-27 07:35:00	12	0	0	0	0	0	0	0	0	0	0	X500
2016-07-27 08:35:00	12	0	0	0	0	0	0	0	0	0	0	X500
2016-07-27 09:35:00	12	0	0	0	0	0	0	0	0	0	0	X500
2016-07-27 10:35:00	12	0	0	0	0	0	0	0	0	0	0	X500
2016-07-27 11:35:00	12	0	0	0	0	0	0	0	0	0	0	X500
2016-07-27 12:35:00	12	0	0	0	0	0	0	0	0	0	0	X500
2016-07-27 13:35:00	12	0	0	0	0	0	0	0	0	0	0	X500
2016-07-27 14:35:00	12	0	0	0	0	0	0	0	0	0	0	X500
2016-07-27 15:35:00	12	0	0	0	0	0	0	0	0	0	0	X500
2016-07-27 16:35:00	12	0	0	0	0	0	0	0	0	0	0	X500
2016-07-27 17:35:00	12	0	0	0	0	0	0	0	0	0	0	X500
2016-07-27 18:35:00	12	0	0	0	0	0	0	0	0	0	0	X500
2016-07-27 19:35:00	9	1	1	0	1	0	0	0	0	0	0	X500
2016-07-27 20:35:00	2	2	0	1	3	0	1	2	0	1	0	X500
2016-07-27 21:35:00	6	4	1	0	1	0	0	0	0	0	0	X500
2016-07-27 22:35:00	11	1	0	0	0	0	0	0	0	0	0	X500
2016-07-27 23:35:00	12	0	0	0	0	0	0	0	0	0	0	X500
2016-07-28 00:35:00	7	3	1	1	0	0	0	0	0	0	0	X500
2016-07-28 01:35:00	4	3	1	0	2	0	0	2	0	0	0	X500
2016-07-28 02:35:00	3	1	0	2	1	1	2	1	1	0	0	X500
2016-07-28 03:35:00	12	0	0	0	0	0	0	0	0	0	0	X500
2016-07-28 04:35:00	12	0	0	0	0	0	0	0	0	0	0	X500
2016-07-28 05:35:00	12	0	0	0	0	0	0	0	0	0	0	X500
2016-07-28 06:35:00	12	0	0	0	0	0	0	0	0	0	0	X500
2016-07-28 07:35:00	12	0	0	0	0	0	0	0	0	0	0	X500
2016-07-28 08:35:00	12	0	0	0	0	0	0	0	0	0	0	X500
2016-07-28 09:35:00	12	0	0	0	0	0	0	0	0	0	0	X500
2016-07-28 10:35:00	12	0	0	0	0	0	0	0	0	0	0	X500
2016-07-28 11:35:00	10	2	0	0	0	0	0	0	0	0	0	X500
2016-07-28 12:35:00	12	0	0	0	0	0	0	0	0	0	0	X500
2016-07-28 13:35:00	12	0	0	0	0	0	0	0	0	0	0	X500
2016-07-28 14:35:00	11	1	0	0	0	0	0	0	0	0	0	X500
2016-07-28 15:35:00	12	0	0	0	0	0	0	0	0	0	0	X500
2016-07-28 16:35:00	12	0	0	0	0	0	0	0	0	0	0	X500
2016-07-28 17:35:00	11	1	0	0	0	0	0	0	0	0	0	X500
2016-07-28 18:35:00	11	1	0	0	0	0	0	0	0	0	0	X500
2016-07-28 19:35:00	12	0	0	0	0	0	0	0	0	0	0	X500
2016-07-28 20:35:00	9	1	0	0	0	2	0	0	0	0	0	X500
2016-07-28 21:35:00	8	2	1	1	0	0	0	0	0	0	0	X500
2016-07-28 22:35:00	10	1	0	0	0	1	0	0	0	0	0	X500
2016-07-28 23:35:00	11	1	0	0	0	0	0	0	0	0	0	X500
2016-07-29 00:35:00	6	2	4	0	0	0	0	0	0	0	0	X500
2016-07-29 01:35:00	2	1	2	0	0	1	1	3	0	1	1	X500
2016-07-29 02:35:00	8	0	1	0	1	0	0	1	1	0	0	X500
2016-07-29 03:35:00	12	0	0	0	0	0	0	0	0	0	0	X500
2016-07-29 04:35:00	12	0	0	0	0	0	0	0	0	0	0	X500
2016-07-29 05:35:00	12	0	0	0	0	0	0	0	0	0	0	X500
2016-07-29 06:35:00	12	0	0	0	0	0	0	0	0	0	0	X500
2016-07-29 07:35:00	12	0	0	0	0	0	0	0	0	0	0	X500
2016-07-29 08:35:00	12	0	0	0	0	0	0	0	0	0	0	X500
2016-07-29 09:35:00	12	0	0	0	0	0	0	0	0	0	0	X500
2016-07-29 10:35:00	12	0	0	0	0	0	0	0	0	0	0	X500
2016-07-29 11:35:00	11	1	0	0	0	0	0	0	0	0	0	X500
2016-07-29 12:35:00	12	0	0	0	0	0	0	0	0	0	0	X500
2016-07-29 13:35:00	12	0	0	0	0	0	0	0	0	0	0	X500
2016-07-29 14:35:00	12	0	0	0	0	0	0	0	0	0	0	X500
2016-07-29 15:35:00	12	0	0	0	0	0	0	0	0	0	0	X500
2016-07-29 16:35:00	12	0	0	0	0	0	0	0	0	0	0	X500
2016-07-29 17:35:00	12	0	0	0	0	0	0	0	0	0	0	X500
2016-07-29 18:35:00	12	0	0	0	0	0	0	0	0	0	0	X500
2016-07-29 19:35:00	12	0	0	0	0	0	0	0	0	0	0	X500
2016-07-29 20:35:00	2	0	0	4	2	1	1	0	0	1	1	X500
2016-07-29 21:35:00	11	0	1	0	0	0	0	0	0	0	0	X500
2016-07-29 22:35:00	11	0	1	0	0	0	0	0	0	0	0	X500
2016-07-29 23:35:00	12	0	0	0	0	0	0	0	0	0	0	X500
2016-07-30 00:35:00	9	1	1	0	0	0	0	1	0	0	0	X500
2016-07-30 01:35:00	3	1	2	2	0	2	2	0	0	0	0	X500
2016-07-30 02:35:00	7	0	0	0	0	0	2	2	1	0	0	X500
2016-07-30 03:35:00	12	0	0	0	0	0	0	0	0	0	0	X500
2016-07-30 04:35:00	12	0	0	0	0	0	0	0	0	0	0	X500
2016-07-30 05:35:00	12	0	0	0	0	0	0	0	0	0	0	X500
2016-07-30 06:35:00	12	0	0	0	0	0	0	0	0	0	0	X500
2016-07-30 07:35:00	12	0	0	0	0	0	0	0	0	0	0	X500
2016-07-30 08:35:00	12	0	0	0	0	0	0	0	0	0	0	X500
2016-07-30 09:35:00	12	0	0	0	0	0	0	0	0	0	0	X500
2016-07-30 10:35:00	12	0	0	0	0	0	0	0	0	0	0	X500
2016-07-30 11:35:00	12	0	0	0	0	0	0	0	0	0	0	X500
2016-07-30 12:35:00	12	0	0	0	0	0	0	0	0	0	0	X500
2016-07-30 13:35:00	12	0	0	0	0	0	0	0	0	0	0	X500
2016-07-30 14:35:00	12	0	0	0	0	0	0	0	0	0	0	X500
2016-07-30 15:35:00	12	0	0	0	0	0	0	0	0	0	0	X500
2016-07-30 16:35:00	12	0	0	0	0	0	0	0	0	0	0	X500
2016-07-30 17:35:00	12	0	0	0	0	0	0	0	0	0	0	X500
2016-07-30 18:35:00	12	0	0	0	0	0	0	0	0	0	0	X500
2016-07-30 19:35:00	12	0	0	0	0	0	0	0	0	0	0	X500
2016-07-30 20:35:00	2	2	1	1	1	2	2	1	0	0	0	X500
2016-07-30 21:35:00	3	5	3	0	0	0	0	0	1	0	0	X500
2016-07-30 22:35:00	9	0	2	1	0	0	0	0	0	0	0	X500
2016-07-30 23:35:00	11	1	0	0	0	0	0	0	0	0	0	X500
2016-07-31 00:35:00	11	0	0	0	0	1	0	0	0	0	0	X500
2016-07-31 01:35:00	1	3	0	1	2	2	2	0	0	1	0	X500
2016-07-31 02:35:00	8	0	0	1	0	0	1	1	0	1	0	X500
2016-07-31 03:35:00	12	0	0	0	0	0	0	0	0	0	0	X500
2016-07-31 04:35:00	12	0	0	0	0	0	0	0	0	0	0	X500
2016-07-31 05:35:00	12	0	0	0	0	0	0	0	0	0	0	X500
2016-07-31 06:35:00	12	0	0	0	0	0	0	0	0	0	0	X500
2016-07-31 07:35:00	12	0	0	0	0	0	0	0	0	0	0	X500
2016-07-31 08:35:00	12	0	0	0	0	0	0	0	0	0	0	X500
2016-07-31 09:35:00	12	0	0	0	0	0	0	0	0	0	0	X500
2016-07-31 10:35:00	12	0	0	0	0	0	0	0	0	0	0	X500
2016-07-31 11:35:00	12	0	0	0	0	0	0	0	0	0	0	X500
2016-07-31 12:35:00	12	0	0	0	0	0	0	0	0	0	0	X500
2016-07-31 13:35:00	12	0	0	0	0	0	0	0	0	0	0	X500
2016-07-31 14:35:00	12	0	0	0	0	0	0	0	0	0	0	X500
2016-07-31 15:35:00	12	0	0	0	0	0	0	0	0	0	0	X500
2016-07-31 16:35:00	12	0	0	0	0	0	0	0	0	0	0	X500
2016-07-31 17:35:00	12	0	0	0	0	0	0	0	0	0	0	X500
2016-07-31 18:35:00	12	0	0	0	0	0	0	0	0	0	0	X500
2016-07-31 19:35:00	10	0	0	1	0	0	0	0	0	1	0	X500
2016-07-31 20:35:00	4	3	2	0	0	1	1	0	1	0	0	X500
2016-07-31 21:35:00	10	1	0	0	0	1	0	0	0	0	0	X500
2016-07-31 22:35:00	8	1	1	1	0	1	0	0	0	0	0	X500
2016-07-31 23:35:00	12	0	0	0	0	0	0	0	0	0	0	X500
2016-08-01 00:35:00	9	1	1	0	0	0	0	0	1	0	0	X500
2016-08-01 01:35:00	2	2	2	2	1	0	2	0	0	1	0	X500
2016-08-01 02:35:00	5	0	0	1	3	0	1	1	0	1	0	X500
2016-08-01 03:35:00	12	0	0	0	0	0	0	0	0	0	0	X500
2016-08-01 04:35:00	12	0	0	0	0	0	0	0	0	0	0	X500
2016-08-01 05:35:00	12	0	0	0	0	0	0	0	0	0	0	X500
2016-08-01 06:35:00	12	0	0	0	0	0	0	0	0	0	0	X500
2016-08-01 07:35:00	12	0	0	0	0	0	0	0	0	0	0	X500
2016-08-01 08:35:00	12	0	0	0	0	0	0	0	0	0	0	X500
2016-08-01 09:35:00	12	0	0	0	0	0	0	0	0	0	0	X500
2016-08-01 10:35:00	12	0	0	0	0	0	0	0	0	0	0	X500
2016-08-01 11:35:00	12	0	0	0	0	0	0	0	0	0	0	X500
2016-08-01 12:35:00	12	0	0	0	0	0	0	0	0	0	0	X500
2016-08-01 13:35:00	12	0	0	0	0	0	0	0	0	0	0	X500
2016-08-01 14:35:00	12	0	0	0	0	0	0	0	0	0	0	X500
2016-08-01 15:35:00	12	0	0	0	0	0	0	0	0	0	0	X500
2016-08-01 16:35:00	12	0	0	0	0	0	0	0	0	0	0	X500
2016-08-01 17:35:00	12	0	0	0	0	0	0	0	0	0	0	X500
2016-08-01 18:35:00	12	0	0	0	0	0	0	0	0	0	0	X500
2016-08-01 19:35:00	10	1	1	0	0	0	0	0	0	0	0	X500
2016-08-01 20:35:00	2	3	0	0	2	0	1	1	1	1	1	X500
2016-08-01 21:35:00	9	0	2	1	0	0	0	0	0	0	0	X500
2016-08-01 22:35:00	12	0	0	0	0	0	0	0	0	0	0	X500
2016-08-01 23:35:00	12	0	0	0	0	0	0	0	0	0	0	X500
2016-08-02 00:35:00	11	0	1	0	0	0	0	0	0	0	0	X500
2016-08-02 01:35:00	3	0	1	1	1	1	1	3	0	1	0	X500
2016-08-02 02:35:00	6	1	1	0	0	0	0	0	3	1	0	X500
2016-08-02 03:35:00	12	0	0	0	0	0	0	0	0	0	0	X500
2016-08-02 04:35:00	12	0	0	0	0	0	0	0	0	0	0	X500
2016-08-02 05:35:00	12	0	0	0	0	0	0	0	0	0	0	X500
2016-08-02 06:35:00	12	0	0	0	0	0	0	0	0	0	0	X500
2016-08-02 07:35:00	12	0	0	0	0	0	0	0	0	0	0	X500
2016-08-02 08:35:00	12	0	0	0	0	0	0	0	0	0	0	X500
2016-08-02 09:35:00	12	0	0	0	0	0	0	0	0	0	0	X500
2016-08-02 10:35:00	12	0	0	0	0	0	0	0	0	0	0	X500
2016-08-02 11:35:00	12	0	0	0	0	0	0	0	0	0	0	X500
2016-08-02 12:35:00	12	0	0	0	0	0	0	0	0	0	0	X500
2016-08-02 13:35:00	12	0	0	0	0	0	0	0	0	0	0	X500
2016-08-02 14:35:00	12	0	0	0	0	0	0	0	0	0	0	X500
2016-08-02 15:35:00	12	0	0	0	0	0	0	0	0	0	0	X500
2016-08-02 16:35:00	12	0	0	0	0	0	0	0	0	0	0	X500
2016-08-02 17:35:00	12	0	0	0	0	0	0	0	0	0	0	X500
2016-08-02 18:35:00	12	0	0	0	0	0	0	0	0	0	0	X500
2016-08-02 19:35:00	10	0	0	0	1	0	0	1	0	0	0	X500
2016-08-02 20:35:00	2	1	1	2	3	2	1	0	0	0	0	X500
2016-08-02 21:35:00	10	2	0	0	0	0	0	0	0	0	0	X500
2016-08-02 22:35:00	12	0	0	0	0	0	0	0	0	0	0	X500
2016-08-02 23:35:00	12	0	0	0	0	0	0	0	0	0	0	X500
2016-08-03 00:35:00	10	1	0	1	0	0	0	0	0	0	0	X500
2016-08-03 01:35:00	1	1	1	3	0	1	4	1	0	0	0	X500
2016-08-03 02:35:00	6	1	0	0	0	3	1	1	0	0	0	X500
2016-08-03 03:35:00	12	0	0	0	0	0	0	0	0	0	0	X500
2016-08-03 04:35:00	12	0	0	0	0	0	0	0	0	0	0	X500
2016-08-03 05:35:00	12	0	0	0	0	0	0	0	0	0	0	X500
2016-08-03 06:35:00	12	0	0	0	0	0	0	0	0	0	0	X500
2016-08-03 07:35:00	12	0	0	0	0	0	0	0	0	0	0	X500
2016-08-03 08:35:00	12	0	0	0	0	0	0	0	0	0	0	X500
2016-08-03 09:35:00	12	0	0	0	0	0	0	0	0	0	0	X500
2016-08-03 10:35:00	12	0	0	0	0	0	0	0	0	0	0	X500
2016-08-03 11:35:00	12	0	0	0	0	0	0	0	0	0	0	X500
2016-08-03 12:35:00	12	0	0	0	0	0	0	0	0	0	0	X500
2016-08-03 13:35:00	12	0	0	0	0	0	0	0	0	0	0	X500
2016-08-03 14:35:00	12	0	0	0	0	0	0	0	0	0	0	X500
2016-08-03 15:35:00	12	0	0	0	0	0	0	0	0	0	0	X500
2016-08-03 16:35:00	12	0	0	0	0	0	0	0	0	0	0	X500
2016-08-03 17:35:00	12	0	0	0	0	0	0	0	0	0	0	X500
2016-08-03 18:35:00	12	0	0	0	0	0	0	0	0	0	0	X500
2016-08-03 19:35:00	6	2	1	1	0	2	0	0	0	0	0	X500
2016-08-03 20:35:00	9	0	0	1	0	0	0	1	1	0	0	X500
2016-08-03 21:35:00	12	0	0	0	0	0	0	0	0	0	0	X500
2016-08-03 22:35:00	12	0	0	0	0	0	0	0	0	0	0	X500
2016-08-03 23:35:00	12	0	0	0	0	0	0	0	0	0	0	X500
2016-08-04 00:35:00	11	0	0	0	0	0	0	0	0	1	0	X500
2016-08-04 01:35:00	5	2	2	1	0	0	0	0	1	1	0	X500
2016-08-04 02:35:00	7	0	0	1	1	0	0	2	0	1	0	X500
2016-08-04 03:35:00	12	0	0	0	0	0	0	0	0	0	0	X500
2016-08-04 04:35:00	12	0	0	0	0	0	0	0	0	0	0	X500
2016-08-04 05:35:00	12	0	0	0	0	0	0	0	0	0	0	X500
2016-08-04 06:35:00	12	0	0	0	0	0	0	0	0	0	0	X500
2016-08-04 07:35:00	12	0	0	0	0	0	0	0	0	0	0	X500
2016-08-04 08:35:00	12	0	0	0	0	0	0	0	0	0	0	X500
2016-08-04 09:35:00	12	0	0	0	0	0	0	0	0	0	0	X500
2016-08-04 10:35:00	12	0	0	0	0	0	0	0	0	0	0	X500
2016-08-04 11:35:00	12	0	0	0	0	0	0	0	0	0	0	X500
2016-08-04 12:35:00	12	0	0	0	0	0	0	0	0	0	0	X500
2016-08-04 13:35:00	12	0	0	0	0	0	0	0	0	0	0	X500
2016-08-04 14:35:00	12	0	0	0	0	0	0	0	0	0	0	X500
2016-08-04 15:35:00	12	0	0	0	0	0	0	0	0	0	0	X500
2016-08-04 16:35:00	12	0	0	0	0	0	0	0	0	0	0	X500
2016-08-04 17:35:00	12	0	0	0	0	0	0	0	0	0	0	X500
2016-08-04 18:35:00	12	0	0	0	0	0	0	0	0	0	0	X500
2016-08-04 19:35:00	9	0	1	1	1	0	0	0	0	0	0	X500
2016-08-04 20:35:00	4	2	4	1	1	0	0	0	0	0	0	X500
2016-08-04 21:35:00	11	1	0	0	0	0	0	0	0	0	0	X500
2016-08-04 22:35:00	12	0	0	0	0	0	0	0	0	0	0	X500
2016-08-04 23:35:00	12	0	0	0	0	0	0	0	0	0	0	X500
2016-08-05 00:35:00	12	0	0	0	0	0	0	0	0	0	0	X500
2016-08-05 01:35:00	7	1	2	0	1	1	0	0	0	0	0	X500
2016-08-05 02:35:00	7	1	0	1	0	0	1	0	1	1	0	X500
2016-08-05 03:35:00	12	0	0	0	0	0	0	0	0	0	0	X500
2016-08-05 04:35:00	12	0	0	0	0	0	0	0	0	0	0	X500
2016-08-05 05:35:00	12	0	0	0	0	0	0	0	0	0	0	X500
2016-08-05 06:35:00	12	0	0	0	0	0	0	0	0	0	0	X500
2016-08-05 07:35:00	12	0	0	0	0	0	0	0	0	0	0	X500
2016-08-05 08:35:00	12	0	0	0	0	0	0	0	0	0	0	X500
2016-08-05 09:35:00	12	0	0	0	0	0	0	0	0	0	0	X500
2016-08-05 10:35:00	12	0	0	0	0	0	0	0	0	0	0	X500
2016-08-05 11:35:00	12	0	0	0	0	0	0	0	0	0	0	X500
2016-08-05 12:35:00	12	0	0	0	0	0	0	0	0	0	0	X500
2016-08-05 13:35:00	12	0	0	0	0	0	0	0	0	0	0	X500
2016-08-05 14:35:00	12	0	0	0	0	0	0	0	0	0	0	X500
2016-08-05 15:35:00	12	0	0	0	0	0	0	0	0	0	0	X500
2016-08-05 16:35:00	12	0	0	0	0	0	0	0	0	0	0	X500
2016-08-05 17:35:00	12	0	0	0	0	0	0	0	0	0	0	X500
2016-08-05 18:35:00	12	0	0	0	0	0	0	0	0	0	0	X500
2016-08-05 19:35:00	9	1	0	0	0	0	0	2	0	0	0	X500
2016-08-05 20:35:00	1	4	3	1	1	2	0	0	0	0	0	X500
2016-08-05 21:35:00	10	2	0	0	0	0	0	0	0	0	0	X500
2016-08-05 22:35:00	12	0	0	0	0	0	0	0	0	0	0	X500
2016-08-05 23:35:00	12	0	0	0	0	0	0	0	0	0	0	X500
2016-08-06 00:35:00	11	1	0	0	0	0	0	0	0	0	0	X500
2016-08-06 01:35:00	8	2	2	0	0	0	0	0	0	0	0	X500
2016-08-06 02:35:00	6	3	0	1	0	0	1	1	0	0	0	X500
2016-08-06 03:35:00	12	0	0	0	0	0	0	0	0	0	0	X500
2016-08-06 04:35:00	12	0	0	0	0	0	0	0	0	0	0	X500
2016-08-06 05:35:00	12	0	0	0	0	0	0	0	0	0	0	X500
2016-08-06 06:35:00	12	0	0	0	0	0	0	0	0	0	0	X500
2016-08-06 07:35:00	12	0	0	0	0	0	0	0	0	0	0	X500
2016-08-06 08:35:00	12	0	0	0	0	0	0	0	0	0	0	X500
2016-08-06 09:35:00	12	0	0	0	0	0	0	0	0	0	0	X500
2016-08-06 10:35:00	12	0	0	0	0	0	0	0	0	0	0	X500
2016-08-06 11:35:00	12	0	0	0	0	0	0	0	0	0	0	X500
2016-08-06 12:35:00	12	0	0	0	0	0	0	0	0	0	0	X500
2016-08-06 13:35:00	12	0	0	0	0	0	0	0	0	0	0	X500
2016-08-06 14:35:00	12	0	0	0	0	0	0	0	0	0	0	X500
2016-08-06 15:35:00	12	0	0	0	0	0	0	0	0	0	0	X500
2016-08-06 16:35:00	12	0	0	0	0	0	0	0	0	0	0	X500
2016-08-06 17:35:00	12	0	0	0	0	0	0	0	0	0	0	X500
2016-08-06 18:35:00	12	0	0	0	0	0	0	0	0	0	0	X500
2016-08-06 19:35:00	9	1	0	0	0	1	0	0	1	0	0	X500
2016-08-06 20:35:00	4	2	2	1	1	1	1	0	0	0	0	X500
2016-08-06 21:35:00	8	3	1	0	0	0	0	0	0	0	0	X500
2016-08-06 22:35:00	12	0	0	0	0	0	0	0	0	0	0	X500
2016-08-06 23:35:00	12	0	0	0	0	0	0	0	0	0	0	X500
2016-08-07 00:35:00	11	1	0	0	0	0	0	0	0	0	0	X500
2016-08-07 01:35:00	6	3	2	1	0	0	0	0	0	0	0	X500
2016-08-07 02:35:00	5	1	0	0	0	2	3	1	0	0	0	X500
2016-08-07 03:35:00	12	0	0	0	0	0	0	0	0	0	0	X500
2016-08-07 04:35:00	12	0	0	0	0	0	0	0	0	0	0	X500
2016-08-07 05:35:00	12	0	0	0	0	0	0	0	0	0	0	X500
2016-08-07 06:35:00	12	0	0	0	0	0	0	0	0	0	0	X500
2016-08-07 07:35:00	12	0	0	0	0	0	0	0	0	0	0	X500
2016-08-07 08:35:00	12	0	0	0	0	0	0	0	0	0	0	X500
2016-08-07 09:35:00	12	0	0	0	0	0	0	0	0	0	0	X500
2016-08-07 10:35:00	12	0	0	0	0	0	0	0	0	0	0	X500
2016-08-07 11:35:00	12	0	0	0	0	0	0	0	0	0	0	X500
2016-08-07 12:35:00	12	0	0	0	0	0	0	0	0	0	0	X500
2016-08-07 13:35:00	12	0	0	0	0	0	0	0	0	0	0	X500
2016-08-07 14:35:00	12	0	0	0	0	0	0	0	0	0	0	X500
2016-08-07 15:35:00	12	0	0	0	0	0	0	0	0	0	0	X500
2016-08-07 16:35:00	12	0	0	0	0	0	0	0	0	0	0	X500
2016-08-07 17:35:00	12	0	0	0	0	0	0	0	0	0	0	X500
2016-08-07 18:35:00	12	0	0	0	0	0	0	0	0	0	0	X500
2016-08-07 19:35:00	8	1	1	0	1	0	1	0	0	0	0	X500
2016-08-07 20:35:00	5	2	1	1	1	0	1	0	0	1	0	X500
2016-08-07 21:35:00	11	1	0	0	0	0	0	0	0	0	0	X500
2016-08-07 22:35:00	11	1	0	0	0	0	0	0	0	0	0	X500
2016-08-07 23:35:00	12	0	0	0	0	0	0	0	0	0	0	X500
2016-08-08 00:35:00	12	0	0	0	0	0	0	0	0	0	0	X500
2016-08-08 01:35:00	7	4	1	0	0	0	0	0	0	0	0	X500
2016-08-08 02:35:00	5	2	0	1	1	0	0	2	1	0	0	X500
2016-08-08 03:35:00	12	0	0	0	0	0	0	0	0	0	0	X500
2016-08-08 04:35:00	12	0	0	0	0	0	0	0	0	0	0	X500
2016-08-08 05:35:00	12	0	0	0	0	0	0	0	0	0	0	X500
2016-08-08 06:35:00	12	0	0	0	0	0	0	0	0	0	0	X500
2016-08-08 07:35:00	12	0	0	0	0	0	0	0	0	0	0	X500
2016-08-08 08:35:00	12	0	0	0	0	0	0	0	0	0	0	X500
2016-08-08 09:35:00	12	0	0	0	0	0	0	0	0	0	0	X500
2016-08-08 10:35:00	12	0	0	0	0	0	0	0	0	0	0	X500
2016-08-08 11:35:00	12	0	0	0	0	0	0	0	0	0	0	X500
2016-08-08 12:35:00	12	0	0	0	0	0	0	0	0	0	0	X500
2016-08-08 13:35:00	12	0	0	0	0	0	0	0	0	0	0	X500
2016-08-08 14:35:00	12	0	0	0	0	0	0	0	0	0	0	X500
2016-08-08 15:35:00	12	0	0	0	0	0	0	0	0	0	0	X500
2016-08-08 16:35:00	12	0	0	0	0	0	0	0	0	0	0	X500
2016-08-08 17:35:00	12	0	0	0	0	0	0	0	0	0	0	X500
2016-08-08 18:35:00	12	0	0	0	0	0	0	0	0	0	0	X500
2016-08-08 19:35:00	8	0	0	1	0	1	2	0	0	0	0	X500
2016-08-08 20:35:00	7	0	2	0	1	1	0	1	0	0	0	X500
2016-08-08 21:35:00	11	1	0	0	0	0	0	0	0	0	0	X500
2016-08-08 22:35:00	11	1	0	0	0	0	0	0	0	0	0	X500
2016-08-08 23:35:00	12	0	0	0	0	0	0	0	0	0	0	X500
2016-08-09 00:35:00	12	0	0	0	0	0	0	0	0	0	0	X500
2016-08-09 01:35:00	10	2	0	0	0	0	0	0	0	0	0	X500
2016-08-09 02:35:00	5	1	2	1	0	0	1	1	1	0	0	X500
2016-08-09 03:35:00	12	0	0	0	0	0	0	0	0	0	0	X500
2016-08-09 04:35:00	12	0	0	0	0	0	0	0	0	0	0	X500
2016-08-09 05:35:00	12	0	0	0	0	0	0	0	0	0	0	X500
2016-08-09 06:35:00	12	0	0	0	0	0	0	0	0	0	0	X500
2016-08-09 07:35:00	12	0	0	0	0	0	0	0	0	0	0	X500
2016-08-09 08:35:00	12	0	0	0	0	0	0	0	0	0	0	X500
2016-08-09 09:35:00	12	0	0	0	0	0	0	0	0	0	0	X500
2016-08-09 10:35:00	12	0	0	0	0	0	0	0	0	0	0	X500
2016-08-09 11:35:00	12	0	0	0	0	0	0	0	0	0	0	X500
2016-08-09 12:35:00	12	0	0	0	0	0	0	0	0	0	0	X500
2016-08-09 13:35:00	12	0	0	0	0	0	0	0	0	0	0	X500
2016-08-09 14:35:00	12	0	0	0	0	0	0	0	0	0	0	X500
2016-08-09 15:35:00	12	0	0	0	0	0	0	0	0	0	0	X500
2016-08-09 16:35:00	12	0	0	0	0	0	0	0	0	0	0	X500
2016-08-09 17:35:00	12	0	0	0	0	0	0	0	0	0	0	X500
2016-08-09 18:35:00	12	0	0	0	0	0	0	0	0	0	0	X500
2016-08-09 19:35:00	7	2	0	3	0	0	0	0	0	0	0	X500
2016-08-09 20:35:00	5	3	2	1	0	0	1	0	0	0	0	X500
2016-08-09 21:35:00	11	1	0	0	0	0	0	0	0	0	0	X500
2016-08-09 22:35:00	12	0	0	0	0	0	0	0	0	0	0	X500
2016-08-09 23:35:00	12	0	0	0	0	0	0	0	0	0	0	X500
2016-08-10 00:35:00	12	0	0	0	0	0	0	0	0	0	0	X500
2016-08-10 01:35:00	9	2	0	0	1	0	0	0	0	0	0	X500
2016-08-10 02:35:00	7	0	1	0	2	0	2	0	0	0	0	X500
2016-08-10 03:35:00	12	0	0	0	0	0	0	0	0	0	0	X500
2016-08-10 04:35:00	12	0	0	0	0	0	0	0	0	0	0	X500
2016-08-10 05:35:00	12	0	0	0	0	0	0	0	0	0	0	X500
2016-08-10 06:35:00	12	0	0	0	0	0	0	0	0	0	0	X500
2016-08-10 07:35:00	12	0	0	0	0	0	0	0	0	0	0	X500
2016-08-10 08:35:00	12	0	0	0	0	0	0	0	0	0	0	X500
2016-08-10 09:35:00	12	0	0	0	0	0	0	0	0	0	0	X500
2016-08-10 10:35:00	12	0	0	0	0	0	0	0	0	0	0	X500
2016-08-10 11:35:00	12	0	0	0	0	0	0	0	0	0	0	X500
2016-08-10 12:35:00	12	0	0	0	0	0	0	0	0	0	0	X500
2016-08-10 13:35:00	12	0	0	0	0	0	0	0	0	0	0	X500
2016-08-10 14:35:00	12	0	0	0	0	0	0	0	0	0	0	X500
2016-08-10 15:35:00	12	0	0	0	0	0	0	0	0	0	0	X500
2016-08-10 16:35:00	12	0	0	0	0	0	0	0	0	0	0	X500
2016-08-10 17:35:00	12	0	0	0	0	0	0	0	0	0	0	X500
2016-08-10 18:35:00	12	0	0	0	0	0	0	0	0	0	0	X500
2016-08-10 19:35:00	7	1	1	2	1	0	0	0	0	0	0	X500
2016-08-10 20:35:00	4	6	2	0	0	0	0	0	0	0	0	X500
2016-08-10 21:35:00	11	0	0	0	0	1	0	0	0	0	0	X500
2016-08-10 22:35:00	12	0	0	0	0	0	0	0	0	0	0	X500
2016-08-10 23:35:00	12	0	0	0	0	0	0	0	0	0	0	X500
2016-08-11 00:35:00	12	0	0	0	0	0	0	0	0	0	0	X500
2016-08-11 01:35:00	12	0	0	0	0	0	0	0	0	0	0	X500
2016-08-11 02:35:00	5	0	1	1	0	1	2	1	0	0	1	X500
2016-08-11 03:35:00	12	0	0	0	0	0	0	0	0	0	0	X500
2016-08-11 04:35:00	12	0	0	0	0	0	0	0	0	0	0	X500
2016-08-11 05:35:00	12	0	0	0	0	0	0	0	0	0	0	X500
2016-08-11 06:35:00	12	0	0	0	0	0	0	0	0	0	0	X500
2016-08-11 07:35:00	12	0	0	0	0	0	0	0	0	0	0	X500
2016-08-11 08:35:00	12	0	0	0	0	0	0	0	0	0	0	X500
2016-08-11 09:35:00	12	0	0	0	0	0	0	0	0	0	0	X500
2016-08-11 10:35:00	12	0	0	0	0	0	0	0	0	0	0	X500
2016-08-11 11:35:00	12	0	0	0	0	0	0	0	0	0	0	X500
2016-08-11 12:35:00	12	0	0	0	0	0	0	0	0	0	0	X500
2016-08-11 13:35:00	12	0	0	0	0	0	0	0	0	0	0	X500
2016-08-11 14:35:00	12	0	0	0	0	0	0	0	0	0	0	X500
2016-08-11 15:35:00	12	0	0	0	0	0	0	0	0	0	0	X500
2016-08-11 16:35:00	12	0	0	0	0	0	0	0	0	0	0	X500
2016-08-11 17:35:00	12	0	0	0	0	0	0	0	0	0	0	X500
2016-08-11 18:35:00	12	0	0	0	0	0	0	0	0	0	0	X500
2016-08-11 19:35:00	8	0	1	1	0	0	2	0	0	0	0	X500
2016-08-11 20:35:00	5	5	2	0	0	0	0	0	0	0	0	X500
2016-08-11 21:35:00	12	0	0	0	0	0	0	0	0	0	0	X500
2016-08-11 22:35:00	12	0	0	0	0	0	0	0	0	0	0	X500
2016-08-11 23:35:00	12	0	0	0	0	0	0	0	0	0	0	X500
2016-08-12 00:35:00	12	0	0	0	0	0	0	0	0	0	0	X500
2016-08-12 01:35:00	11	0	0	0	0	0	0	0	0	0	1	X500
2016-08-12 02:35:00	6	1	0	2	2	0	1	0	0	0	0	X500
2016-08-12 03:35:00	12	0	0	0	0	0	0	0	0	0	0	X500
2016-08-12 04:35:00	12	0	0	0	0	0	0	0	0	0	0	X500
2016-08-12 05:35:00	12	0	0	0	0	0	0	0	0	0	0	X500
2016-08-12 06:35:00	12	0	0	0	0	0	0	0	0	0	0	X500
2016-08-12 07:35:00	12	0	0	0	0	0	0	0	0	0	0	X500
2016-08-12 08:35:00	12	0	0	0	0	0	0	0	0	0	0	X500
2016-08-12 09:35:00	12	0	0	0	0	0	0	0	0	0	0	X500
2016-08-12 10:35:00	12	0	0	0	0	0	0	0	0	0	0	X500
2016-08-12 11:35:00	12	0	0	0	0	0	0	0	0	0	0	X500
2016-08-12 12:35:00	12	0	0	0	0	0	0	0	0	0	0	X500
2016-08-12 13:35:00	12	0	0	0	0	0	0	0	0	0	0	X500
2016-08-12 14:35:00	12	0	0	0	0	0	0	0	0	0	0	X500
2016-08-12 15:35:00	12	0	0	0	0	0	0	0	0	0	0	X500
2016-08-12 16:35:00	12	0	0	0	0	0	0	0	0	0	0	X500
2016-08-12 17:35:00	12	0	0	0	0	0	0	0	0	0	0	X500
2016-08-12 18:35:00	12	0	0	0	0	0	0	0	0	0	0	X500
2016-08-12 19:35:00	4	1	4	1	1	0	0	1	0	0	0	X500
2016-08-12 20:35:00	8	1	3	0	0	0	0	0	0	0	0	X500
2016-08-12 21:35:00	11	0	0	0	1	0	0	0	0	0	0	X500
2016-08-12 22:35:00	12	0	0	0	0	0	0	0	0	0	0	X500
2016-08-12 23:35:00	11	1	0	0	0	0	0	0	0	0	0	X500
2016-08-13 00:35:00	12	0	0	0	0	0	0	0	0	0	0	X500
2016-08-13 01:35:00	9	1	2	0	0	0	0	0	0	0	0	X500
2016-08-13 02:35:00	8	2	1	0	0	0	0	0	0	1	0	X500
2016-08-13 03:35:00	11	1	0	0	0	0	0	0	0	0	0	X500
2016-08-13 04:35:00	12	0	0	0	0	0	0	0	0	0	0	X500
2016-08-13 05:35:00	12	0	0	0	0	0	0	0	0	0	0	X500
2016-08-13 06:35:00	12	0	0	0	0	0	0	0	0	0	0	X500
2016-08-13 07:35:00	12	0	0	0	0	0	0	0	0	0	0	X500
2016-08-13 08:35:00	12	0	0	0	0	0	0	0	0	0	0	X500
2016-08-13 09:35:00	12	0	0	0	0	0	0	0	0	0	0	X500
2016-08-13 10:35:00	12	0	0	0	0	0	0	0	0	0	0	X500
2016-08-13 11:35:00	12	0	0	0	0	0	0	0	0	0	0	X500
2016-08-13 12:35:00	12	0	0	0	0	0	0	0	0	0	0	X500
2016-08-13 13:35:00	12	0	0	0	0	0	0	0	0	0	0	X500
2016-08-13 14:35:00	12	0	0	0	0	0	0	0	0	0	0	X500
2016-08-13 15:35:00	12	0	0	0	0	0	0	0	0	0	0	X500
2016-08-13 16:35:00	12	0	0	0	0	0	0	0	0	0	0	X500
2016-08-13 17:35:00	12	0	0	0	0	0	0	0	0	0	0	X500
2016-08-13 18:35:00	12	0	0	0	0	0	0	0	0	0	0	X500
2016-08-13 19:35:00	6	2	2	0	1	0	0	0	0	1	0	X500
2016-08-13 20:35:00	7	2	3	0	0	0	0	0	0	0	0	X500
2016-08-13 21:35:00	9	3	0	0	0	0	0	0	0	0	0	X500
2016-08-13 22:35:00	9	2	1	0	0	0	0	0	0	0	0	X500
2016-08-13 23:35:00	12	0	0	0	0	0	0	0	0	0	0	X500
2016-08-14 00:35:00	12	0	0	0	0	0	0	0	0	0	0	X500
2016-08-14 01:35:00	9	2	0	0	1	0	0	0	0	0	0	X500
2016-08-14 02:35:00	4	3	1	1	0	1	1	0	0	1	0	X500
2016-08-14 03:35:00	12	0	0	0	0	0	0	0	0	0	0	X500
2016-08-14 04:35:00	12	0	0	0	0	0	0	0	0	0	0	X500
2016-08-14 05:35:00	12	0	0	0	0	0	0	0	0	0	0	X500
2016-08-14 06:35:00	12	0	0	0	0	0	0	0	0	0	0	X500
2016-08-14 07:35:00	12	0	0	0	0	0	0	0	0	0	0	X500
2016-08-14 08:35:00	12	0	0	0	0	0	0	0	0	0	0	X500
2016-08-14 09:35:00	12	0	0	0	0	0	0	0	0	0	0	X500
2016-08-14 10:35:00	12	0	0	0	0	0	0	0	0	0	0	X500
2016-08-14 11:35:00	12	0	0	0	0	0	0	0	0	0	0	X500
2016-08-14 12:35:00	12	0	0	0	0	0	0	0	0	0	0	X500
2016-08-14 13:35:00	12	0	0	0	0	0	0	0	0	0	0	X500
2016-08-14 14:35:00	12	0	0	0	0	0	0	0	0	0	0	X500
2016-08-14 15:35:00	12	0	0	0	0	0	0	0	0	0	0	X500
2016-08-14 16:35:00	12	0	0	0	0	0	0	0	0	0	0	X500
2016-08-14 17:35:00	12	0	0	0	0	0	0	0	0	0	0	X500
2016-08-14 18:35:00	12	0	0	0	0	0	0	0	0	0	0	X500
2016-08-14 19:35:00	6	2	1	0	1	0	0	1	0	0	1	X500
2016-08-14 20:35:00	0	0	0	0	0	0	0	1	0	0	11	X500
2016-08-14 21:35:00	0	0	0	0	0	0	0	0	0	2	10	X500
2016-08-14 22:35:00	0	0	0	0	0	0	0	0	0	0	12	X500
2016-08-14 23:35:00	0	0	0	0	0	0	0	0	0	0	12	X500
2016-08-15 00:35:00	0	0	0	0	0	0	0	0	0	0	12	X500
2016-08-15 01:35:00	0	0	0	0	0	0	0	0	0	2	10	X500
2016-08-15 02:35:00	3	1	0	0	0	2	0	2	0	2	2	X500
2016-08-15 03:35:00	10	0	0	0	1	0	0	0	1	0	0	X500
2016-08-15 04:35:00	12	0	0	0	0	0	0	0	0	0	0	X500
2016-08-15 05:35:00	12	0	0	0	0	0	0	0	0	0	0	X500
2016-08-15 06:35:00	12	0	0	0	0	0	0	0	0	0	0	X500
2016-08-15 07:35:00	12	0	0	0	0	0	0	0	0	0	0	X500
2016-08-15 08:35:00	12	0	0	0	0	0	0	0	0	0	0	X500
2016-08-15 09:35:00	12	0	0	0	0	0	0	0	0	0	0	X500
2016-08-15 10:35:00	12	0	0	0	0	0	0	0	0	0	0	X500
2016-08-15 11:35:00	12	0	0	0	0	0	0	0	0	0	0	X500
2016-08-15 12:35:00	12	0	0	0	0	0	0	0	0	0	0	X500
2016-08-15 13:35:00	12	0	0	0	0	0	0	0	0	0	0	X500
2016-08-15 14:35:00	12	0	0	0	0	0	0	0	0	0	0	X500
2016-08-15 15:35:00	12	0	0	0	0	0	0	0	0	0	0	X500
2016-08-15 16:35:00	12	0	0	0	0	0	0	0	0	0	0	X500
2016-08-15 17:35:00	12	0	0	0	0	0	0	0	0	0	0	X500
2016-08-15 18:35:00	12	0	0	0	0	0	0	0	0	0	0	X500
2016-08-15 19:35:00	0	0	0	0	1	1	3	2	0	1	4	X500
2016-08-15 20:35:00	0	0	0	0	0	0	0	0	1	2	9	X500
2016-08-15 21:35:00	0	0	0	0	0	0	0	0	0	0	12	X500
2016-08-15 22:35:00	0	0	0	0	0	0	0	0	0	0	12	X500
2016-08-15 23:35:00	0	0	0	0	0	0	0	0	1	0	11	X500
2016-08-16 00:35:00	0	0	0	0	0	0	0	0	0	0	12	X500
2016-08-16 01:35:00	0	0	0	0	0	0	0	0	0	2	10	X500
2016-08-16 02:35:00	0	0	0	1	0	1	1	1	0	1	7	X500
2016-08-16 03:35:00	7	2	2	0	0	0	0	1	0	0	0	X500
2016-08-16 04:35:00	12	0	0	0	0	0	0	0	0	0	0	X500
2016-08-16 05:35:00	12	0	0	0	0	0	0	0	0	0	0	X500
2016-08-16 06:35:00	12	0	0	0	0	0	0	0	0	0	0	X500
2016-08-16 07:35:00	12	0	0	0	0	0	0	0	0	0	0	X500
2016-08-16 08:35:00	12	0	0	0	0	0	0	0	0	0	0	X500
2016-08-16 09:35:00	12	0	0	0	0	0	0	0	0	0	0	X500
2016-08-16 10:35:00	12	0	0	0	0	0	0	0	0	0	0	X500
2016-08-16 11:35:00	12	0	0	0	0	0	0	0	0	0	0	X500
2016-08-16 12:35:00	12	0	0	0	0	0	0	0	0	0	0	X500
2016-08-16 13:35:00	12	0	0	0	0	0	0	0	0	0	0	X500
2016-08-16 14:35:00	12	0	0	0	0	0	0	0	0	0	0	X500
2016-08-16 15:35:00	12	0	0	0	0	0	0	0	0	0	0	X500
2016-08-16 16:35:00	12	0	0	0	0	0	0	0	0	0	0	X500
2016-08-16 17:35:00	12	0	0	0	0	0	0	0	0	0	0	X500
2016-08-16 18:35:00	7	1	1	0	0	0	0	2	0	1	0	X500
2016-08-16 19:35:00	7	2	1	1	0	0	0	0	1	0	0	X500
2016-08-16 20:35:00	5	3	0	0	0	0	0	0	0	1	3	X500
2016-08-16 21:35:00	8	0	1	0	0	0	0	1	0	1	1	X500
2016-08-16 22:35:00	1	0	0	0	0	0	0	0	0	1	10	X500
2016-08-16 23:35:00	2	0	0	0	0	0	0	0	1	1	8	X500
2016-08-17 00:35:00	2	1	2	0	0	1	0	0	0	0	6	X500
2016-08-17 01:35:00	0	0	0	0	0	1	0	1	1	1	8	X500
2016-08-17 02:35:00	5	0	1	0	1	1	1	0	0	0	3	X500
2016-08-17 03:35:00	8	1	0	1	0	0	0	1	0	0	1	X500
2016-08-17 04:35:00	12	0	0	0	0	0	0	0	0	0	0	X500
2016-08-17 05:35:00	12	0	0	0	0	0	0	0	0	0	0	X500
2016-08-17 06:35:00	12	0	0	0	0	0	0	0	0	0	0	X500
2016-08-17 07:35:00	12	0	0	0	0	0	0	0	0	0	0	X500
2016-08-17 08:35:00	12	0	0	0	0	0	0	0	0	0	0	X500
2016-08-17 09:35:00	12	0	0	0	0	0	0	0	0	0	0	X500
2016-08-17 10:35:00	12	0	0	0	0	0	0	0	0	0	0	X500
2016-08-17 11:35:00	12	0	0	0	0	0	0	0	0	0	0	X500
2016-08-17 12:35:00	12	0	0	0	0	0	0	0	0	0	0	X500
2016-08-17 13:35:00	12	0	0	0	0	0	0	0	0	0	0	X500
2016-08-17 14:35:00	12	0	0	0	0	0	0	0	0	0	0	X500
2016-08-17 15:35:00	12	0	0	0	0	0	0	0	0	0	0	X500
2016-08-17 16:35:00	12	0	0	0	0	0	0	0	0	0	0	X500
2016-08-17 17:35:00	12	0	0	0	0	0	0	0	0	0	0	X500
2016-08-17 18:35:00	7	1	1	1	0	0	0	2	0	0	0	X500
2016-08-17 19:35:00	0	3	1	0	0	0	1	2	0	0	5	X500
2016-08-17 20:35:00	0	0	1	1	0	0	0	0	0	1	9	X500
2016-08-17 21:35:00	2	1	0	0	0	0	1	1	1	0	6	X500
2016-08-17 22:35:00	3	0	0	1	1	0	1	2	1	2	1	X500
2016-08-17 23:35:00	3	0	1	2	0	0	0	0	0	3	3	X500
2016-08-18 00:35:00	2	0	0	0	0	0	0	1	1	0	8	X500
2016-08-18 01:35:00	2	1	0	0	0	0	0	1	2	1	5	X500
2016-08-18 02:35:00	9	1	1	1	0	0	0	0	0	0	0	X500
2016-08-18 03:35:00	7	1	1	0	0	1	0	0	1	1	0	X500
2016-08-18 04:35:00	12	0	0	0	0	0	0	0	0	0	0	X500
2016-08-18 05:35:00	12	0	0	0	0	0	0	0	0	0	0	X500
2016-08-18 06:35:00	12	0	0	0	0	0	0	0	0	0	0	X500
2016-08-18 07:35:00	12	0	0	0	0	0	0	0	0	0	0	X500
2016-08-18 08:35:00	12	0	0	0	0	0	0	0	0	0	0	X500
2016-08-18 09:35:00	12	0	0	0	0	0	0	0	0	0	0	X500
2016-08-18 10:35:00	12	0	0	0	0	0	0	0	0	0	0	X500
2016-08-18 11:35:00	12	0	0	0	0	0	0	0	0	0	0	X500
2016-08-18 12:35:00	12	0	0	0	0	0	0	0	0	0	0	X500
2016-08-18 13:35:00	12	0	0	0	0	0	0	0	0	0	0	X500
2016-08-18 14:35:00	12	0	0	0	0	0	0	0	0	0	0	X500
2016-08-18 15:35:00	12	0	0	0	0	0	0	0	0	0	0	X500
2016-08-18 16:35:00	12	0	0	0	0	0	0	0	0	0	0	X500
2016-08-18 17:35:00	12	0	0	0	0	0	0	0	0	0	0	X500
2016-08-18 18:35:00	8	0	2	0	0	0	0	0	2	0	0	X500
2016-08-18 19:35:00	8	0	0	0	0	0	0	0	0	0	4	X500
2016-08-18 20:35:00	0	0	0	1	0	0	1	1	1	3	5	X500
2016-08-18 21:35:00	3	0	0	1	0	0	0	1	2	5	0	X500
2016-08-18 22:35:00	3	0	0	0	1	0	0	1	3	2	2	X500
2016-08-18 23:35:00	7	0	0	1	0	0	0	2	0	0	2	X500
2016-08-19 00:35:00	7	0	0	0	0	1	0	0	1	2	1	X500
2016-08-19 01:35:00	9	1	1	1	0	0	0	0	0	0	0	X500
2016-08-19 02:35:00	5	4	1	1	0	0	1	0	0	0	0	X500
2016-08-19 03:35:00	9	0	0	0	1	0	0	1	0	1	0	X500
2016-08-19 04:35:00	12	0	0	0	0	0	0	0	0	0	0	X500
2016-08-19 05:35:00	12	0	0	0	0	0	0	0	0	0	0	X500
2016-08-19 06:35:00	12	0	0	0	0	0	0	0	0	0	0	X500
2016-08-19 07:35:00	12	0	0	0	0	0	0	0	0	0	0	X500
2016-08-19 08:35:00	12	0	0	0	0	0	0	0	0	0	0	X500
2016-08-19 09:35:00	12	0	0	0	0	0	0	0	0	0	0	X500
2016-08-19 10:35:00	12	0	0	0	0	0	0	0	0	0	0	X500
2016-08-19 11:35:00	12	0	0	0	0	0	0	0	0	0	0	X500
2016-08-19 12:35:00	12	0	0	0	0	0	0	0	0	0	0	X500
2016-08-19 13:35:00	12	0	0	0	0	0	0	0	0	0	0	X500
2016-08-19 14:35:00	12	0	0	0	0	0	0	0	0	0	0	X500
2016-08-19 15:35:00	12	0	0	0	0	0	0	0	0	0	0	X500
2016-08-19 16:35:00	12	0	0	0	0	0	0	0	0	0	0	X500
2016-08-19 17:35:00	12	0	0	0	0	0	0	0	0	0	0	X500
2016-08-19 18:35:00	7	0	1	0	0	1	2	0	1	0	0	X500
2016-08-19 19:35:00	7	0	3	2	0	0	0	0	0	0	0	X500
2016-08-19 20:35:00	12	0	0	0	0	0	0	0	0	0	0	X500
2016-08-19 21:35:00	8	1	1	1	1	0	0	0	0	0	0	X500
2016-08-19 22:35:00	6	4	2	0	0	0	0	0	0	0	0	X500
2016-08-19 23:35:00	5	5	2	0	0	0	0	0	0	0	0	X500
2016-08-20 00:35:00	7	2	1	0	1	0	1	0	0	0	0	X500
2016-08-20 01:35:00	9	2	1	0	0	0	0	0	0	0	0	X500
2016-08-20 02:35:00	8	0	3	1	0	0	0	0	0	0	0	X500
2016-08-20 03:35:00	8	1	1	1	0	0	1	0	0	0	0	X500
2016-08-20 04:35:00	12	0	0	0	0	0	0	0	0	0	0	X500
2016-08-20 05:35:00	12	0	0	0	0	0	0	0	0	0	0	X500
2016-08-20 06:35:00	12	0	0	0	0	0	0	0	0	0	0	X500
2016-08-20 07:35:00	12	0	0	0	0	0	0	0	0	0	0	X500
2016-08-20 08:35:00	12	0	0	0	0	0	0	0	0	0	0	X500
2016-08-20 09:35:00	12	0	0	0	0	0	0	0	0	0	0	X500
2016-08-20 10:35:00	12	0	0	0	0	0	0	0	0	0	0	X500
2016-08-20 11:35:00	12	0	0	0	0	0	0	0	0	0	0	X500
2016-08-20 12:35:00	12	0	0	0	0	0	0	0	0	0	0	X500
2016-08-20 13:35:00	12	0	0	0	0	0	0	0	0	0	0	X500
2016-08-20 14:35:00	12	0	0	0	0	0	0	0	0	0	0	X500
2016-08-20 15:35:00	12	0	0	0	0	0	0	0	0	0	0	X500
2016-08-20 16:35:00	12	0	0	0	0	0	0	0	0	0	0	X500
2016-08-20 17:35:00	12	0	0	0	0	0	0	0	0	0	0	X500
2016-08-20 18:35:00	6	2	0	2	2	0	0	0	0	0	0	X500
2016-08-20 19:35:00	7	1	0	2	1	1	0	0	0	0	0	X500
2016-08-20 20:35:00	9	1	1	0	1	0	0	0	0	0	0	X500
2016-08-20 21:35:00	10	1	0	0	0	1	0	0	0	0	0	X500
2016-08-20 22:35:00	7	3	2	0	0	0	0	0	0	0	0	X500
2016-08-20 23:35:00	8	0	4	0	0	0	0	0	0	0	0	X500
2016-08-21 00:35:00	9	2	1	0	0	0	0	0	0	0	0	X500
2016-08-21 01:35:00	11	0	0	0	0	0	1	0	0	0	0	X500
2016-08-21 02:35:00	8	2	1	0	0	0	1	0	0	0	0	X500
2016-08-21 03:35:00	7	1	1	1	0	0	0	1	0	1	0	X500
2016-08-21 04:35:00	12	0	0	0	0	0	0	0	0	0	0	X500
2016-08-21 05:35:00	12	0	0	0	0	0	0	0	0	0	0	X500
2016-08-21 06:35:00	12	0	0	0	0	0	0	0	0	0	0	X500
2016-08-21 07:35:00	12	0	0	0	0	0	0	0	0	0	0	X500
2016-08-21 08:35:00	12	0	0	0	0	0	0	0	0	0	0	X500
2016-08-21 09:35:00	12	0	0	0	0	0	0	0	0	0	0	X500
2016-08-21 10:35:00	12	0	0	0	0	0	0	0	0	0	0	X500
2016-08-21 11:35:00	12	0	0	0	0	0	0	0	0	0	0	X500
2016-08-21 12:35:00	12	0	0	0	0	0	0	0	0	0	0	X500
2016-08-21 13:35:00	12	0	0	0	0	0	0	0	0	0	0	X500
2016-08-21 14:35:00	12	0	0	0	0	0	0	0	0	0	0	X500
2016-08-21 15:35:00	12	0	0	0	0	0	0	0	0	0	0	X500
2016-08-21 16:35:00	12	0	0	0	0	0	0	0	0	0	0	X500
2016-08-21 17:35:00	12	0	0	0	0	0	0	0	0	0	0	X500
2016-08-21 18:35:00	5	2	0	1	0	0	3	0	0	0	1	X500
2016-08-21 19:35:00	10	1	1	0	0	0	0	0	0	0	0	X500
2016-08-21 20:35:00	10	0	1	1	0	0	0	0	0	0	0	X500
2016-08-21 21:35:00	8	1	2	0	0	0	1	0	0	0	0	X500
2016-08-21 22:35:00	10	1	1	0	0	0	0	0	0	0	0	X500
2016-08-21 23:35:00	6	2	4	0	0	0	0	0	0	0	0	X500
2016-08-22 00:35:00	7	1	1	1	0	1	0	0	1	0	0	X500
2016-08-22 01:35:00	9	2	1	0	0	0	0	0	0	0	0	X500
2016-08-22 02:35:00	8	3	0	1	0	0	0	0	0	0	0	X500
2016-08-22 03:35:00	3	4	2	1	1	0	0	1	0	0	0	X500
2016-08-22 04:35:00	12	0	0	0	0	0	0	0	0	0	0	X500
2016-08-22 05:35:00	12	0	0	0	0	0	0	0	0	0	0	X500
2016-08-22 06:35:00	12	0	0	0	0	0	0	0	0	0	0	X500
2016-08-22 07:35:00	12	0	0	0	0	0	0	0	0	0	0	X500
2016-08-22 08:35:00	12	0	0	0	0	0	0	0	0	0	0	X500
2016-08-22 09:35:00	12	0	0	0	0	0	0	0	0	0	0	X500
2016-08-22 10:35:00	12	0	0	0	0	0	0	0	0	0	0	X500
2016-08-22 11:35:00	12	0	0	0	0	0	0	0	0	0	0	X500
2016-08-22 12:35:00	12	0	0	0	0	0	0	0	0	0	0	X500
2016-08-22 13:35:00	12	0	0	0	0	0	0	0	0	0	0	X500
2016-08-22 14:35:00	12	0	0	0	0	0	0	0	0	0	0	X500
2016-08-22 15:35:00	12	0	0	0	0	0	0	0	0	0	0	X500
2016-08-22 16:35:00	12	0	0	0	0	0	0	0	0	0	0	X500
2016-08-22 17:35:00	12	0	0	0	0	0	0	0	0	0	0	X500
2016-08-22 18:35:00	5	1	2	3	0	1	0	0	0	0	0	X500
2016-08-22 19:35:00	12	0	0	0	0	0	0	0	0	0	0	X500
2016-08-22 20:35:00	11	1	0	0	0	0	0	0	0	0	0	X500
2016-08-22 21:35:00	8	2	0	0	1	0	0	1	0	0	0	X500
2016-08-22 22:35:00	11	1	0	0	0	0	0	0	0	0	0	X500
2016-08-22 23:35:00	10	1	0	0	0	0	1	0	0	0	0	X500
2016-08-23 00:35:00	5	3	2	2	0	0	0	0	0	0	0	X500
2016-08-23 01:35:00	8	1	1	1	0	0	0	0	0	0	1	X500
2016-08-23 02:35:00	9	2	0	0	0	0	0	0	1	0	0	X500
2016-08-23 03:35:00	6	2	2	1	0	1	0	0	0	0	0	X500
2016-08-23 04:35:00	12	0	0	0	0	0	0	0	0	0	0	X500
2016-08-23 05:35:00	12	0	0	0	0	0	0	0	0	0	0	X500
2016-08-23 06:35:00	12	0	0	0	0	0	0	0	0	0	0	X500
2016-08-23 07:35:00	12	0	0	0	0	0	0	0	0	0	0	X500
2016-08-23 08:35:00	12	0	0	0	0	0	0	0	0	0	0	X500
2016-08-23 09:35:00	12	0	0	0	0	0	0	0	0	0	0	X500
2016-08-23 10:35:00	12	0	0	0	0	0	0	0	0	0	0	X500
2016-08-23 11:35:00	12	0	0	0	0	0	0	0	0	0	0	X500
2016-08-23 12:35:00	12	0	0	0	0	0	0	0	0	0	0	X500
2016-08-23 13:35:00	12	0	0	0	0	0	0	0	0	0	0	X500
2016-08-23 14:35:00	12	0	0	0	0	0	0	0	0	0	0	X500
2016-08-23 15:35:00	12	0	0	0	0	0	0	0	0	0	0	X500
2016-08-23 16:35:00	12	0	0	0	0	0	0	0	0	0	0	X500
2016-08-23 17:35:00	12	0	0	0	0	0	0	0	0	0	0	X500
2016-08-23 18:35:00	5	2	1	0	1	0	1	0	2	0	0	X500
2016-08-23 19:35:00	8	1	2	1	0	0	0	0	0	0	0	X500
2016-08-23 20:35:00	11	1	0	0	0	0	0	0	0	0	0	X500
2016-08-23 21:35:00	12	0	0	0	0	0	0	0	0	0	0	X500
2016-08-23 22:35:00	12	0	0	0	0	0	0	0	0	0	0	X500
2016-08-23 23:35:00	11	0	0	1	0	0	0	0	0	0	0	X500
2016-08-24 00:35:00	7	3	0	0	0	0	1	1	0	0	0	X500
2016-08-24 01:35:00	12	0	0	0	0	0	0	0	0	0	0	X500
2016-08-24 02:35:00	7	3	1	0	1	0	0	0	0	0	0	X500
2016-08-24 03:35:00	4	2	2	0	0	0	2	0	2	0	0	X500
2016-08-24 04:35:00	12	0	0	0	0	0	0	0	0	0	0	X500
2016-08-24 05:35:00	12	0	0	0	0	0	0	0	0	0	0	X500
2016-08-24 06:35:00	12	0	0	0	0	0	0	0	0	0	0	X500
2016-08-24 07:35:00	12	0	0	0	0	0	0	0	0	0	0	X500
2016-08-24 08:35:00	12	0	0	0	0	0	0	0	0	0	0	X500
2016-08-24 09:35:00	12	0	0	0	0	0	0	0	0	0	0	X500
2016-08-24 10:35:00	12	0	0	0	0	0	0	0	0	0	0	X500
2016-08-24 11:35:00	12	0	0	0	0	0	0	0	0	0	0	X500
2016-08-24 12:35:00	12	0	0	0	0	0	0	0	0	0	0	X500
2016-08-24 13:35:00	12	0	0	0	0	0	0	0	0	0	0	X500
2016-08-24 14:35:00	12	0	0	0	0	0	0	0	0	0	0	X500
2016-08-24 15:35:00	12	0	0	0	0	0	0	0	0	0	0	X500
2016-08-24 16:35:00	12	0	0	0	0	0	0	0	0	0	0	X500
2016-08-24 17:35:00	12	0	0	0	0	0	0	0	0	0	0	X500
2016-08-24 18:35:00	5	0	2	0	0	0	1	1	0	2	1	X500
2016-08-24 19:35:00	8	0	3	0	1	0	0	0	0	0	0	X500
2016-08-24 20:35:00	10	1	1	0	0	0	0	0	0	0	0	X500
2016-08-24 21:35:00	12	0	0	0	0	0	0	0	0	0	0	X500
2016-08-24 22:35:00	9	2	1	0	0	0	0	0	0	0	0	X500
2016-08-24 23:35:00	10	2	0	0	0	0	0	0	0	0	0	X500
2016-08-25 00:35:00	10	2	0	0	0	0	0	0	0	0	0	X500
2016-08-25 01:35:00	12	0	0	0	0	0	0	0	0	0	0	X500
2016-08-25 02:35:00	11	0	0	1	0	0	0	0	0	0	0	X500
2016-08-25 03:35:00	6	2	0	1	1	0	0	0	2	0	0	X500
2016-08-25 04:35:00	12	0	0	0	0	0	0	0	0	0	0	X500
2016-08-25 05:35:00	12	0	0	0	0	0	0	0	0	0	0	X500
2016-08-25 06:35:00	12	0	0	0	0	0	0	0	0	0	0	X500
2016-08-25 07:35:00	12	0	0	0	0	0	0	0	0	0	0	X500
2016-08-25 08:35:00	12	0	0	0	0	0	0	0	0	0	0	X500
2016-08-25 09:35:00	12	0	0	0	0	0	0	0	0	0	0	X500
2016-08-25 10:35:00	12	0	0	0	0	0	0	0	0	0	0	X500
2016-08-25 11:35:00	12	0	0	0	0	0	0	0	0	0	0	X500
2016-08-25 12:35:00	12	0	0	0	0	0	0	0	0	0	0	X500
2016-08-25 13:35:00	12	0	0	0	0	0	0	0	0	0	0	X500
2016-08-25 14:35:00	12	0	0	0	0	0	0	0	0	0	0	X500
2016-08-25 15:35:00	12	0	0	0	0	0	0	0	0	0	0	X500
2016-08-25 16:35:00	12	0	0	0	0	0	0	0	0	0	0	X500
2016-08-25 17:35:00	12	0	0	0	0	0	0	0	0	0	0	X500
2016-08-25 18:35:00	5	0	1	1	1	0	1	0	3	0	0	X500
2016-08-25 19:35:00	7	2	0	2	1	0	0	0	0	0	0	X500
2016-08-25 20:35:00	10	1	1	0	0	0	0	0	0	0	0	X500
2016-08-25 21:35:00	12	0	0	0	0	0	0	0	0	0	0	X500
2016-08-25 22:35:00	12	0	0	0	0	0	0	0	0	0	0	X500
2016-08-25 23:35:00	12	0	0	0	0	0	0	0	0	0	0	X500
2016-08-26 00:35:00	12	0	0	0	0	0	0	0	0	0	0	X500
2016-08-26 01:35:00	11	1	0	0	0	0	0	0	0	0	0	X500
2016-08-26 02:35:00	6	2	1	3	0	0	0	0	0	0	0	X500
2016-08-26 03:35:00	6	1	1	1	0	0	2	0	1	0	0	X500
2016-08-26 04:35:00	12	0	0	0	0	0	0	0	0	0	0	X500
2016-08-26 05:35:00	12	0	0	0	0	0	0	0	0	0	0	X500
2016-08-26 06:35:00	12	0	0	0	0	0	0	0	0	0	0	X500
2016-08-26 07:35:00	12	0	0	0	0	0	0	0	0	0	0	X500
2016-08-26 08:35:00	12	0	0	0	0	0	0	0	0	0	0	X500
2016-08-26 09:35:00	12	0	0	0	0	0	0	0	0	0	0	X500
2016-08-26 10:35:00	12	0	0	0	0	0	0	0	0	0	0	X500
2016-08-26 11:35:00	12	0	0	0	0	0	0	0	0	0	0	X500
2016-08-26 12:35:00	12	0	0	0	0	0	0	0	0	0	0	X500
2016-08-26 13:35:00	12	0	0	0	0	0	0	0	0	0	0	X500
2016-08-26 14:35:00	12	0	0	0	0	0	0	0	0	0	0	X500
2016-08-26 15:35:00	12	0	0	0	0	0	0	0	0	0	0	X500
2016-08-26 16:35:00	12	0	0	0	0	0	0	0	0	0	0	X500
2016-08-26 17:35:00	12	0	0	0	0	0	0	0	0	0	0	X500
2016-08-26 18:35:00	5	1	0	0	0	2	0	2	1	1	0	X500
2016-08-26 19:35:00	10	1	0	0	0	1	0	0	0	0	0	X500
2016-08-26 20:35:00	12	0	0	0	0	0	0	0	0	0	0	X500
2016-08-26 21:35:00	12	0	0	0	0	0	0	0	0	0	0	X500
2016-08-26 22:35:00	11	0	0	1	0	0	0	0	0	0	0	X500
2016-08-26 23:35:00	12	0	0	0	0	0	0	0	0	0	0	X500
2016-08-27 00:35:00	12	0	0	0	0	0	0	0	0	0	0	X500
2016-08-27 01:35:00	12	0	0	0	0	0	0	0	0	0	0	X500
2016-08-27 02:35:00	8	2	1	0	0	0	0	0	0	1	0	X500
2016-08-27 03:35:00	4	0	1	1	2	0	3	0	0	1	0	X500
2016-08-27 04:35:00	12	0	0	0	0	0	0	0	0	0	0	X500
2016-08-27 05:35:00	12	0	0	0	0	0	0	0	0	0	0	X500
2016-08-27 06:35:00	12	0	0	0	0	0	0	0	0	0	0	X500
2016-08-27 07:35:00	12	0	0	0	0	0	0	0	0	0	0	X500
2016-08-27 08:35:00	12	0	0	0	0	0	0	0	0	0	0	X500
2016-08-27 09:35:00	12	0	0	0	0	0	0	0	0	0	0	X500
2016-08-27 10:35:00	12	0	0	0	0	0	0	0	0	0	0	X500
2016-08-27 11:35:00	12	0	0	0	0	0	0	0	0	0	0	X500
2016-08-27 12:35:00	12	0	0	0	0	0	0	0	0	0	0	X500
2016-08-27 13:35:00	12	0	0	0	0	0	0	0	0	0	0	X500
2016-08-27 14:35:00	12	0	0	0	0	0	0	0	0	0	0	X500
2016-08-27 15:35:00	12	0	0	0	0	0	0	0	0	0	0	X500
2016-08-27 16:35:00	12	0	0	0	0	0	0	0	0	0	0	X500
2016-08-27 17:35:00	12	0	0	0	0	0	0	0	0	0	0	X500
2016-08-27 18:35:00	5	0	0	0	0	0	2	0	4	0	1	X500
2016-08-27 19:35:00	12	0	0	0	0	0	0	0	0	0	0	X500
2016-08-27 20:35:00	11	1	0	0	0	0	0	0	0	0	0	X500
2016-08-27 21:35:00	12	0	0	0	0	0	0	0	0	0	0	X500
2016-08-27 22:35:00	12	0	0	0	0	0	0	0	0	0	0	X500
2016-08-27 23:35:00	12	0	0	0	0	0	0	0	0	0	0	X500
2016-08-28 00:35:00	12	0	0	0	0	0	0	0	0	0	0	X500
2016-08-28 01:35:00	12	0	0	0	0	0	0	0	0	0	0	X500
2016-08-28 02:35:00	10	2	0	0	0	0	0	0	0	0	0	X500
2016-08-28 03:35:00	5	2	1	1	0	0	0	1	1	0	1	X500
2016-08-28 04:35:00	12	0	0	0	0	0	0	0	0	0	0	X500
2016-08-28 05:35:00	12	0	0	0	0	0	0	0	0	0	0	X500
2016-08-28 06:35:00	12	0	0	0	0	0	0	0	0	0	0	X500
2016-08-28 07:35:00	12	0	0	0	0	0	0	0	0	0	0	X500
2016-08-28 08:35:00	12	0	0	0	0	0	0	0	0	0	0	X500
2016-08-28 09:35:00	12	0	0	0	0	0	0	0	0	0	0	X500
2016-08-28 10:35:00	12	0	0	0	0	0	0	0	0	0	0	X500
2016-08-28 11:35:00	12	0	0	0	0	0	0	0	0	0	0	X500
2016-08-28 12:35:00	12	0	0	0	0	0	0	0	0	0	0	X500
2016-08-28 13:35:00	12	0	0	0	0	0	0	0	0	0	0	X500
2016-08-28 14:35:00	12	0	0	0	0	0	0	0	0	0	0	X500
2016-08-28 15:35:00	12	0	0	0	0	0	0	0	0	0	0	X500
2016-08-28 16:35:00	12	0	0	0	0	0	0	0	0	0	0	X500
2016-08-28 17:35:00	12	0	0	0	0	0	0	0	0	0	0	X500
2016-08-28 18:35:00	5	0	1	0	0	1	1	1	3	0	0	X500
2016-08-28 19:35:00	12	0	0	0	0	0	0	0	0	0	0	X500
2016-08-28 20:35:00	12	0	0	0	0	0	0	0	0	0	0	X500
2016-08-28 21:35:00	12	0	0	0	0	0	0	0	0	0	0	X500
2016-08-28 22:35:00	12	0	0	0	0	0	0	0	0	0	0	X500
2016-08-28 23:35:00	12	0	0	0	0	0	0	0	0	0	0	X500
2016-08-29 00:35:00	12	0	0	0	0	0	0	0	0	0	0	X500
2016-08-29 01:35:00	12	0	0	0	0	0	0	0	0	0	0	X500
2016-08-29 02:35:00	11	0	1	0	0	0	0	0	0	0	0	X500
2016-08-29 03:35:00	6	1	2	2	1	0	0	0	0	0	0	X500
2016-08-29 04:35:00	12	0	0	0	0	0	0	0	0	0	0	X500
2016-08-29 05:35:00	12	0	0	0	0	0	0	0	0	0	0	X500
2016-08-29 06:35:00	12	0	0	0	0	0	0	0	0	0	0	X500
2016-08-29 07:35:00	12	0	0	0	0	0	0	0	0	0	0	X500
2016-08-29 08:35:00	12	0	0	0	0	0	0	0	0	0	0	X500
2016-08-29 09:35:00	12	0	0	0	0	0	0	0	0	0	0	X500
2016-08-29 10:35:00	12	0	0	0	0	0	0	0	0	0	0	X500
2016-08-29 11:35:00	12	0	0	0	0	0	0	0	0	0	0	X500
2016-08-29 12:35:00	12	0	0	0	0	0	0	0	0	0	0	X500
2016-08-29 13:35:00	12	0	0	0	0	0	0	0	0	0	0	X500
2016-08-29 14:35:00	12	0	0	0	0	0	0	0	0	0	0	X500
2016-08-29 15:35:00	12	0	0	0	0	0	0	0	0	0	0	X500
2016-08-29 16:35:00	12	0	0	0	0	0	0	0	0	0	0	X500
2016-08-29 17:35:00	12	0	0	0	0	0	0	0	0	0	0	X500
2016-08-29 18:35:00	4	0	2	0	1	0	0	1	0	0	4	X500
2016-08-29 19:35:00	0	0	0	0	0	0	0	0	0	0	12	X500
2016-08-29 20:35:00	0	0	0	0	0	0	0	0	0	0	12	X500
2016-08-29 21:35:00	0	0	0	0	0	0	0	0	0	0	12	X500
2016-08-29 22:35:00	0	0	0	0	0	0	0	0	1	0	11	X500
2016-08-29 23:35:00	0	0	0	0	0	0	0	0	0	0	12	X500
2016-08-30 00:35:00	0	0	0	0	0	0	0	0	0	0	12	X500
2016-08-30 01:35:00	0	0	0	0	0	0	0	0	0	0	12	X500
2016-08-30 02:35:00	0	0	0	0	0	0	0	0	0	0	12	X500
2016-08-30 03:35:00	6	1	0	0	1	0	0	0	1	0	3	X500
2016-08-30 04:35:00	12	0	0	0	0	0	0	0	0	0	0	X500
2016-08-30 05:35:00	12	0	0	0	0	0	0	0	0	0	0	X500
2016-08-30 06:35:00	12	0	0	0	0	0	0	0	0	0	0	X500
2016-08-30 07:35:00	12	0	0	0	0	0	0	0	0	0	0	X500
2016-08-30 08:35:00	12	0	0	0	0	0	0	0	0	0	0	X500
2016-08-30 09:35:00	12	0	0	0	0	0	0	0	0	0	0	X500
2016-08-30 10:35:00	12	0	0	0	0	0	0	0	0	0	0	X500
2016-08-30 11:35:00	12	0	0	0	0	0	0	0	0	0	0	X500
2016-08-30 12:35:00	12	0	0	0	0	0	0	0	0	0	0	X500
2016-08-30 13:35:00	12	0	0	0	0	0	0	0	0	0	0	X500
2016-08-30 14:35:00	12	0	0	0	0	0	0	0	0	0	0	X500
2016-08-30 15:35:00	12	0	0	0	0	0	0	0	0	0	0	X500
2016-08-30 16:35:00	12	0	0	0	0	0	0	0	0	0	0	X500
2016-08-30 17:35:00	11	1	0	0	0	0	0	0	0	0	0	X500
2016-08-30 18:35:00	2	0	1	0	0	0	0	0	0	1	8	X500
2016-08-30 19:35:00	0	0	0	0	0	0	0	1	0	0	11	X500
2016-08-30 20:35:00	0	0	0	0	0	0	1	0	0	1	10	X500
2016-08-30 21:35:00	0	0	0	0	0	0	0	0	0	1	11	X500
2016-08-30 22:35:00	0	0	0	0	0	0	1	0	2	3	6	X500
2016-08-30 23:35:00	0	0	0	0	0	0	3	1	3	0	5	X500
2016-08-31 00:35:00	0	0	0	0	0	0	0	0	0	0	12	X500
2016-08-31 01:35:00	0	0	0	0	0	0	0	0	0	0	12	X500
2016-08-31 02:35:00	0	0	0	0	0	0	1	1	1	0	9	X500
2016-08-31 03:35:00	6	1	1	0	0	2	1	0	1	0	0	X500
2016-08-31 04:35:00	12	0	0	0	0	0	0	0	0	0	0	X500
2016-08-31 05:35:00	12	0	0	0	0	0	0	0	0	0	0	X500
2016-08-31 06:35:00	12	0	0	0	0	0	0	0	0	0	0	X500
2016-08-31 07:35:00	12	0	0	0	0	0	0	0	0	0	0	X500
2016-08-31 08:35:00	12	0	0	0	0	0	0	0	0	0	0	X500
2016-08-31 09:35:00	12	0	0	0	0	0	0	0	0	0	0	X500
2016-08-31 10:35:00	12	0	0	0	0	0	0	0	0	0	0	X500
2016-08-31 11:35:00	12	0	0	0	0	0	0	0	0	0	0	X500
2016-08-31 12:35:00	12	0	0	0	0	0	0	0	0	0	0	X500
2016-08-31 13:35:00	12	0	0	0	0	0	0	0	0	0	0	X500
2016-08-31 14:35:00	12	0	0	0	0	0	0	0	0	0	0	X500
2016-08-31 15:35:00	12	0	0	0	0	0	0	0	0	0	0	X500
2016-08-31 16:35:00	12	0	0	0	0	0	0	0	0	0	0	X500
2016-08-31 17:35:00	9	0	0	0	1	1	0	0	0	0	1	X500
2016-08-31 18:35:00	0	0	0	0	0	0	0	0	0	0	12	X500
2016-08-31 19:35:00	0	0	0	0	0	0	0	0	0	0	12	X500
2016-08-31 20:35:00	0	0	0	0	0	0	0	0	0	0	12	X500
2016-08-31 21:35:00	0	0	0	0	0	0	0	0	0	0	12	X500
2016-08-31 22:35:00	0	0	0	0	0	0	0	0	0	0	12	X500
2016-08-31 23:35:00	0	0	0	0	0	0	0	0	0	0	12	X500
2016-09-01 00:35:00	0	0	0	0	0	0	0	0	0	0	12	X500
2016-09-01 01:35:00	9	0	0	0	0	0	0	0	1	1	1	X500
2016-09-01 02:35:00	12	0	0	0	0	0	0	0	0	0	0	X500
2016-09-01 03:35:00	11	1	0	0	0	0	0	0	0	0	0	X500
2016-09-01 04:35:00	12	0	0	0	0	0	0	0	0	0	0	X500
2016-09-01 05:35:00	12	0	0	0	0	0	0	0	0	0	0	X500
2016-09-01 06:35:00	12	0	0	0	0	0	0	0	0	0	0	X500
2016-09-01 07:35:00	12	0	0	0	0	0	0	0	0	0	0	X500
2016-09-01 08:35:00	12	0	0	0	0	0	0	0	0	0	0	X500
2016-09-01 09:35:00	12	0	0	0	0	0	0	0	0	0	0	X500
2016-09-01 10:35:00	12	0	0	0	0	0	0	0	0	0	0	X500
2016-09-01 11:35:00	12	0	0	0	0	0	0	0	0	0	0	X500
2016-09-01 12:35:00	12	0	0	0	0	0	0	0	0	0	0	X500
2016-09-01 13:35:00	12	0	0	0	0	0	0	0	0	0	0	X500
2016-09-01 14:35:00	12	0	0	0	0	0	0	0	0	0	0	X500
2016-09-01 15:35:00	12	0	0	0	0	0	0	0	0	0	0	X500
2016-09-01 16:35:00	12	0	0	0	0	0	0	0	0	0	0	X500
2016-09-01 17:35:00	8	0	1	1	0	0	1	1	0	0	0	X500
2016-09-01 18:35:00	0	0	0	0	0	0	0	0	0	1	11	X500
2016-09-01 19:35:00	0	0	0	0	0	0	0	0	0	0	12	X500
2016-09-01 20:35:00	0	0	0	0	0	0	0	0	0	1	11	X500
2016-09-01 21:35:00	0	0	0	0	0	0	0	1	0	0	11	X500
2016-09-01 22:35:00	0	0	0	0	0	0	0	1	0	0	11	X500
2016-09-01 23:35:00	0	0	0	0	0	0	0	0	0	0	12	X500
2016-09-02 00:35:00	0	0	0	0	0	0	0	0	1	2	9	X500
2016-09-02 01:35:00	0	0	0	0	0	0	0	0	0	0	12	X500
2016-09-02 02:35:00	11	0	0	0	0	0	0	0	0	1	0	X500
2016-09-02 03:35:00	11	0	0	1	0	0	0	0	0	0	0	X500
2016-09-02 04:35:00	12	0	0	0	0	0	0	0	0	0	0	X500
2016-09-02 05:35:00	12	0	0	0	0	0	0	0	0	0	0	X500
2016-09-02 06:35:00	12	0	0	0	0	0	0	0	0	0	0	X500
2016-09-02 07:35:00	12	0	0	0	0	0	0	0	0	0	0	X500
2016-09-02 08:35:00	12	0	0	0	0	0	0	0	0	0	0	X500
2016-09-02 09:35:00	12	0	0	0	0	0	0	0	0	0	0	X500
2016-09-02 10:35:00	12	0	0	0	0	0	0	0	0	0	0	X500
2016-09-02 11:35:00	12	0	0	0	0	0	0	0	0	0	0	X500
2016-09-02 12:35:00	12	0	0	0	0	0	0	0	0	0	0	X500
2016-09-02 13:35:00	12	0	0	0	0	0	0	0	0	0	0	X500
2016-09-02 14:35:00	12	0	0	0	0	0	0	0	0	0	0	X500
2016-09-02 15:35:00	12	0	0	0	0	0	0	0	0	0	0	X500
2016-09-02 16:35:00	12	0	0	0	0	0	0	0	0	0	0	X500
2016-09-02 17:35:00	7	0	0	0	0	0	0	0	0	0	5	X500
2016-09-02 18:35:00	0	0	0	0	0	0	0	0	0	0	12	X500
2016-09-02 19:35:00	0	0	0	0	0	0	0	0	0	0	12	X500
2016-09-02 20:35:00	0	0	0	0	0	0	0	0	0	0	12	X500
2016-09-02 21:35:00	0	0	0	0	0	0	0	0	0	0	12	X500
2016-09-02 22:35:00	0	0	0	0	0	0	0	0	0	0	12	X500
2016-09-02 23:35:00	0	0	0	0	0	0	0	0	0	0	12	X500
2016-09-03 00:35:00	0	0	0	0	0	0	0	0	0	0	12	X500
2016-09-03 01:35:00	0	0	0	0	0	0	0	3	0	2	7	X500
2016-09-03 02:35:00	5	0	0	0	0	1	0	1	2	0	3	X500
2016-09-03 03:35:00	9	1	0	0	1	0	0	0	1	0	0	X500
2016-09-03 04:35:00	12	0	0	0	0	0	0	0	0	0	0	X500
2016-09-03 05:35:00	12	0	0	0	0	0	0	0	0	0	0	X500
2016-09-03 06:35:00	12	0	0	0	0	0	0	0	0	0	0	X500
2016-09-03 07:35:00	12	0	0	0	0	0	0	0	0	0	0	X500
2016-09-03 08:35:00	12	0	0	0	0	0	0	0	0	0	0	X500
2016-09-03 09:35:00	12	0	0	0	0	0	0	0	0	0	0	X500
2016-09-03 10:35:00	12	0	0	0	0	0	0	0	0	0	0	X500
2016-09-03 11:35:00	12	0	0	0	0	0	0	0	0	0	0	X500
2016-09-03 12:35:00	12	0	0	0	0	0	0	0	0	0	0	X500
2016-09-03 13:35:00	12	0	0	0	0	0	0	0	0	0	0	X500
2016-09-03 14:35:00	12	0	0	0	0	0	0	0	0	0	0	X500
2016-09-03 15:35:00	12	0	0	0	0	0	0	0	0	0	0	X500
2016-09-03 16:35:00	12	0	0	0	0	0	0	0	0	0	0	X500
2016-09-03 17:35:00	2	0	0	0	0	0	0	0	0	2	8	X500
2016-09-03 18:35:00	0	0	0	0	0	0	0	0	0	0	12	X500
2016-09-03 19:35:00	0	0	0	0	0	0	0	0	0	1	11	X500
2016-09-03 20:35:00	0	0	0	0	0	0	0	0	0	1	11	X500
2016-09-03 21:35:00	0	0	0	0	0	0	0	0	0	1	11	X500
2016-09-03 22:35:00	0	0	0	0	0	0	0	0	0	0	12	X500
2016-09-03 23:35:00	0	0	0	0	0	0	0	0	0	0	12	X500
2016-09-04 00:35:00	0	0	0	0	0	0	0	1	2	1	8	X500
2016-09-04 01:35:00	0	0	0	0	0	1	0	0	0	1	10	X500
2016-09-04 02:35:00	0	0	0	0	0	1	0	0	0	1	10	X500
2016-09-04 03:35:00	6	0	0	0	1	0	1	0	0	0	4	X500
2016-09-04 04:35:00	12	0	0	0	0	0	0	0	0	0	0	X500
2016-09-04 05:35:00	12	0	0	0	0	0	0	0	0	0	0	X500
2016-09-04 06:35:00	12	0	0	0	0	0	0	0	0	0	0	X500
2016-09-04 07:35:00	12	0	0	0	0	0	0	0	0	0	0	X500
2016-09-04 08:35:00	12	0	0	0	0	0	0	0	0	0	0	X500
2016-09-04 09:35:00	12	0	0	0	0	0	0	0	0	0	0	X500
2016-09-04 10:35:00	12	0	0	0	0	0	0	0	0	0	0	X500
2016-09-04 11:35:00	12	0	0	0	0	0	0	0	0	0	0	X500
2016-09-04 12:35:00	12	0	0	0	0	0	0	0	0	0	0	X500
2016-09-04 13:35:00	12	0	0	0	0	0	0	0	0	0	0	X500
2016-09-04 14:35:00	12	0	0	0	0	0	0	0	0	0	0	X500
2016-09-04 15:35:00	12	0	0	0	0	0	0	0	0	0	0	X500
2016-09-04 16:35:00	12	0	0	0	0	0	0	0	0	0	0	X500
2016-09-04 17:35:00	1	0	0	0	0	0	0	0	0	2	9	X500
2016-09-04 18:35:00	0	0	0	0	0	0	0	0	0	0	12	X500
2016-09-04 19:35:00	0	0	0	0	0	0	0	0	0	0	12	X500
2016-09-04 20:35:00	0	0	0	0	0	0	0	0	0	0	12	X500
2016-09-04 21:35:00	0	0	0	0	0	0	0	0	0	1	11	X500
2016-09-04 22:35:00	0	0	0	0	0	0	0	0	0	0	12	X500
2016-09-04 23:35:00	0	0	0	0	0	0	0	0	0	1	11	X500
2016-09-05 00:35:00	0	0	0	0	0	0	0	0	0	1	11	X500
2016-09-05 01:35:00	0	0	0	0	0	0	0	0	0	1	11	X500
2016-09-05 02:35:00	0	0	0	0	0	0	0	0	0	2	10	X500
2016-09-05 03:35:00	6	2	1	0	0	0	0	2	0	0	1	X500
2016-09-05 04:35:00	12	0	0	0	0	0	0	0	0	0	0	X500
2016-09-05 05:35:00	12	0	0	0	0	0	0	0	0	0	0	X500
2016-09-05 06:35:00	12	0	0	0	0	0	0	0	0	0	0	X500
2016-09-05 07:35:00	12	0	0	0	0	0	0	0	0	0	0	X500
2016-09-05 08:35:00	12	0	0	0	0	0	0	0	0	0	0	X500
2016-09-05 09:35:00	12	0	0	0	0	0	0	0	0	0	0	X500
2016-09-05 10:35:00	12	0	0	0	0	0	0	0	0	0	0	X500
2016-09-05 11:35:00	12	0	0	0	0	0	0	0	0	0	0	X500
2016-09-05 12:35:00	12	0	0	0	0	0	0	0	0	0	0	X500
2016-09-05 13:35:00	12	0	0	0	0	0	0	0	0	0	0	X500
2016-09-05 14:35:00	11	1	0	0	0	0	0	0	0	0	0	X500
2016-09-05 15:35:00	12	0	0	0	0	0	0	0	0	0	0	X500
2016-09-05 16:35:00	11	0	0	0	0	0	0	0	0	0	1	X500
2016-09-05 17:35:00	0	0	0	0	0	0	0	0	1	1	10	X500
2016-09-05 18:35:00	0	0	0	0	0	0	0	0	0	1	11	X500
2016-09-05 19:35:00	0	0	0	0	0	0	0	0	0	1	11	X500
2016-09-05 20:35:00	0	0	0	0	0	0	0	0	0	4	8	X500
2016-09-05 21:35:00	0	0	0	0	0	0	0	0	0	3	9	X500
2016-09-05 22:35:00	0	0	0	0	0	0	0	0	1	2	9	X500
2016-09-05 23:35:00	0	0	0	0	0	0	0	0	0	4	8	X500
2016-09-06 00:35:00	0	0	0	0	0	0	0	0	1	2	9	X500
2016-09-06 01:35:00	0	0	0	0	0	0	0	0	1	2	9	X500
2016-09-06 02:35:00	0	0	0	0	0	0	0	0	1	3	8	X500
2016-09-06 03:35:00	0	0	0	0	0	2	2	2	1	2	3	X500
2016-09-06 04:35:00	12	0	0	0	0	0	0	0	0	0	0	X500
2016-09-06 05:35:00	12	0	0	0	0	0	0	0	0	0	0	X500
2016-09-06 06:35:00	12	0	0	0	0	0	0	0	0	0	0	X500
2016-09-06 07:35:00	12	0	0	0	0	0	0	0	0	0	0	X500
2016-09-06 08:35:00	12	0	0	0	0	0	0	0	0	0	0	X500
2016-09-06 09:35:00	12	0	0	0	0	0	0	0	0	0	0	X500
2016-09-06 10:35:00	12	0	0	0	0	0	0	0	0	0	0	X500
2016-09-06 11:35:00	12	0	0	0	0	0	0	0	0	0	0	X500
2016-09-06 12:35:00	12	0	0	0	0	0	0	0	0	0	0	X500
2016-09-06 13:35:00	12	0	0	0	0	0	0	0	0	0	0	X500
2016-09-06 14:35:00	12	0	0	0	0	0	0	0	0	0	0	X500
2016-09-06 15:35:00	12	0	0	0	0	0	0	0	0	0	0	X500
2016-09-06 16:35:00	12	0	0	0	0	0	0	0	0	0	0	X500
2016-09-06 17:35:00	4	2	0	0	0	0	0	1	1	0	4	X500
2016-09-06 18:35:00	0	0	0	0	0	0	1	1	2	3	5	X500
2016-09-06 19:35:00	0	0	0	0	0	0	0	0	0	1	11	X500
2016-09-06 20:35:00	0	0	0	0	0	0	0	0	0	0	12	X500
2016-09-06 21:35:00	0	0	0	0	1	1	0	0	2	3	5	X500
2016-09-06 22:35:00	0	0	0	0	0	1	0	1	2	1	7	X500
2016-09-06 23:35:00	5	0	1	0	0	1	1	1	0	0	3	X500
2016-09-07 00:35:00	3	0	0	0	0	0	0	0	0	1	8	X500
2016-09-07 01:35:00	0	0	0	0	0	0	0	0	0	0	12	X500
2016-09-07 02:35:00	0	0	0	0	0	0	1	3	1	3	4	X500
2016-09-07 03:35:00	0	1	0	0	1	0	0	3	3	1	3	X500
2016-09-07 04:35:00	10	2	0	0	0	0	0	0	0	0	0	X500
2016-09-07 05:35:00	12	0	0	0	0	0	0	0	0	0	0	X500
2016-09-07 06:35:00	12	0	0	0	0	0	0	0	0	0	0	X500
2016-09-07 07:35:00	12	0	0	0	0	0	0	0	0	0	0	X500
2016-09-07 08:35:00	12	0	0	0	0	0	0	0	0	0	0	X500
2016-09-07 09:35:00	12	0	0	0	0	0	0	0	0	0	0	X500
2016-09-07 10:35:00	12	0	0	0	0	0	0	0	0	0	0	X500
2016-09-07 11:35:00	12	0	0	0	0	0	0	0	0	0	0	X500
2016-09-07 12:35:00	12	0	0	0	0	0	0	0	0	0	0	X500
2016-09-07 13:35:00	12	0	0	0	0	0	0	0	0	0	0	X500
2016-09-07 14:35:00	12	0	0	0	0	0	0	0	0	0	0	X500
2016-09-07 15:35:00	12	0	0	0	0	0	0	0	0	0	0	X500
2016-09-07 16:35:00	10	0	1	0	0	0	0	0	1	0	0	X500
2016-09-07 17:35:00	1	1	0	0	0	1	1	0	2	0	6	X500
2016-09-07 18:35:00	0	0	0	0	0	0	0	0	0	0	12	X500
2016-09-07 19:35:00	0	0	0	1	0	0	0	0	0	1	10	X500
2016-09-07 20:35:00	3	1	2	2	0	0	1	0	0	1	2	X500
2016-09-07 21:35:00	10	0	1	0	0	1	0	0	0	0	0	X500
2016-09-07 22:35:00	12	0	0	0	0	0	0	0	0	0	0	X500
2016-09-07 23:35:00	12	0	0	0	0	0	0	0	0	0	0	X500
2016-09-08 00:35:00	12	0	0	0	0	0	0	0	0	0	0	X500
2016-09-08 01:35:00	12	0	0	0	0	0	0	0	0	0	0	X500
2016-09-08 02:35:00	12	0	0	0	0	0	0	0	0	0	0	X500
2016-09-08 03:35:00	4	3	0	0	0	0	0	2	2	1	0	X500
2016-09-08 04:35:00	7	1	2	0	0	1	1	0	0	0	0	X500
2016-09-08 05:35:00	12	0	0	0	0	0	0	0	0	0	0	X500
2016-09-08 06:35:00	12	0	0	0	0	0	0	0	0	0	0	X500
2016-09-08 07:35:00	12	0	0	0	0	0	0	0	0	0	0	X500
2016-09-08 08:35:00	12	0	0	0	0	0	0	0	0	0	0	X500
2016-09-08 09:35:00	12	0	0	0	0	0	0	0	0	0	0	X500
2016-09-08 10:35:00	11	1	0	0	0	0	0	0	0	0	0	X500
2016-09-08 11:35:00	12	0	0	0	0	0	0	0	0	0	0	X500
2016-09-08 12:35:00	12	0	0	0	0	0	0	0	0	0	0	X500
2016-09-08 13:35:00	12	0	0	0	0	0	0	0	0	0	0	X500
2016-09-08 14:35:00	12	0	0	0	0	0	0	0	0	0	0	X500
2016-09-08 15:35:00	12	0	0	0	0	0	0	0	0	0	0	X500
2016-09-08 16:35:00	12	0	0	0	0	0	0	0	0	0	0	X500
2016-09-08 17:35:00	7	0	1	0	1	2	1	0	0	0	0	X500
2016-09-08 18:35:00	10	2	0	0	0	0	0	0	0	0	0	X500
2016-09-08 19:35:00	12	0	0	0	0	0	0	0	0	0	0	X500
2016-09-08 20:35:00	11	1	0	0	0	0	0	0	0	0	0	X500
2016-09-08 21:35:00	12	0	0	0	0	0	0	0	0	0	0	X500
2016-09-08 22:35:00	12	0	0	0	0	0	0	0	0	0	0	X500
2016-09-08 23:35:00	11	0	0	0	0	0	0	1	0	0	0	X500
2016-09-09 00:35:00	12	0	0	0	0	0	0	0	0	0	0	X500
2016-09-09 01:35:00	12	0	0	0	0	0	0	0	0	0	0	X500
2016-09-09 02:35:00	12	0	0	0	0	0	0	0	0	0	0	X500
2016-09-09 03:35:00	10	1	0	0	1	0	0	0	0	0	0	X500
2016-09-09 04:35:00	10	1	0	1	0	0	0	0	0	0	0	X500
2016-09-09 05:35:00	12	0	0	0	0	0	0	0	0	0	0	X500
2016-09-09 06:35:00	12	0	0	0	0	0	0	0	0	0	0	X500
2016-09-09 07:35:00	12	0	0	0	0	0	0	0	0	0	0	X500
2016-09-09 08:35:00	12	0	0	0	0	0	0	0	0	0	0	X500
2016-09-09 09:35:00	12	0	0	0	0	0	0	0	0	0	0	X500
2016-09-09 10:35:00	12	0	0	0	0	0	0	0	0	0	0	X500
2016-09-09 11:35:00	12	0	0	0	0	0	0	0	0	0	0	X500
2016-09-09 12:35:00	12	0	0	0	0	0	0	0	0	0	0	X500
2016-09-09 13:35:00	12	0	0	0	0	0	0	0	0	0	0	X500
2016-09-09 14:35:00	12	0	0	0	0	0	0	0	0	0	0	X500
2016-09-09 15:35:00	12	0	0	0	0	0	0	0	0	0	0	X500
2016-09-09 16:35:00	12	0	0	0	0	0	0	0	0	0	0	X500
2016-09-09 17:35:00	3	2	2	3	1	1	0	0	0	0	0	X500
2016-09-09 18:35:00	9	2	0	1	0	0	0	0	0	0	0	X500
2016-09-09 19:35:00	7	4	1	0	0	0	0	0	0	0	0	X500
2016-09-09 20:35:00	11	1	0	0	0	0	0	0	0	0	0	X500
2016-09-09 21:35:00	9	3	0	0	0	0	0	0	0	0	0	X500
2016-09-09 22:35:00	12	0	0	0	0	0	0	0	0	0	0	X500
2016-09-09 23:35:00	12	0	0	0	0	0	0	0	0	0	0	X500
2016-09-10 00:35:00	12	0	0	0	0	0	0	0	0	0	0	X500
2016-09-10 01:35:00	12	0	0	0	0	0	0	0	0	0	0	X500
2016-09-10 02:35:00	12	0	0	0	0	0	0	0	0	0	0	X500
2016-09-10 03:35:00	10	1	0	1	0	0	0	0	0	0	0	X500
2016-09-10 04:35:00	10	1	0	0	1	0	0	0	0	0	0	X500
2016-09-10 05:35:00	12	0	0	0	0	0	0	0	0	0	0	X500
2016-09-10 06:35:00	12	0	0	0	0	0	0	0	0	0	0	X500
2016-09-10 07:35:00	12	0	0	0	0	0	0	0	0	0	0	X500
2016-09-10 08:35:00	12	0	0	0	0	0	0	0	0	0	0	X500
2016-09-10 09:35:00	12	0	0	0	0	0	0	0	0	0	0	X500
2016-09-10 10:35:00	12	0	0	0	0	0	0	0	0	0	0	X500
2016-09-10 11:35:00	12	0	0	0	0	0	0	0	0	0	0	X500
2016-09-10 12:35:00	12	0	0	0	0	0	0	0	0	0	0	X500
2016-09-10 13:35:00	12	0	0	0	0	0	0	0	0	0	0	X500
2016-09-10 14:35:00	12	0	0	0	0	0	0	0	0	0	0	X500
2016-09-10 15:35:00	12	0	0	0	0	0	0	0	0	0	0	X500
2016-09-10 16:35:00	12	0	0	0	0	0	0	0	0	0	0	X500
2016-09-10 17:35:00	6	0	2	3	0	0	1	0	0	0	0	X500
2016-09-10 18:35:00	6	5	0	0	0	1	0	0	0	0	0	X500
2016-09-10 19:35:00	5	4	2	0	0	0	1	0	0	0	0	X500
2016-09-10 20:35:00	11	1	0	0	0	0	0	0	0	0	0	X500
2016-09-10 21:35:00	8	3	0	0	1	0	0	0	0	0	0	X500
2016-09-10 22:35:00	10	1	1	0	0	0	0	0	0	0	0	X500
2016-09-10 23:35:00	12	0	0	0	0	0	0	0	0	0	0	X500
2016-09-11 00:35:00	12	0	0	0	0	0	0	0	0	0	0	X500
2016-09-11 01:35:00	12	0	0	0	0	0	0	0	0	0	0	X500
2016-09-11 02:35:00	12	0	0	0	0	0	0	0	0	0	0	X500
2016-09-11 03:35:00	11	0	1	0	0	0	0	0	0	0	0	X500
2016-09-11 04:35:00	8	2	1	1	0	0	0	0	0	0	0	X500
2016-09-11 05:35:00	12	0	0	0	0	0	0	0	0	0	0	X500
2016-09-11 06:35:00	12	0	0	0	0	0	0	0	0	0	0	X500
2016-09-11 07:35:00	12	0	0	0	0	0	0	0	0	0	0	X500
2016-09-11 08:35:00	12	0	0	0	0	0	0	0	0	0	0	X500
2016-09-11 09:35:00	12	0	0	0	0	0	0	0	0	0	0	X500
2016-09-11 10:35:00	12	0	0	0	0	0	0	0	0	0	0	X500
2016-09-11 11:35:00	12	0	0	0	0	0	0	0	0	0	0	X500
2016-09-11 12:35:00	12	0	0	0	0	0	0	0	0	0	0	X500
2016-09-11 13:35:00	12	0	0	0	0	0	0	0	0	0	0	X500
2016-09-11 14:35:00	12	0	0	0	0	0	0	0	0	0	0	X500
2016-09-11 15:35:00	12	0	0	0	0	0	0	0	0	0	0	X500
2016-09-11 16:35:00	12	0	0	0	0	0	0	0	0	0	0	X500
2016-09-11 17:35:00	6	3	2	0	0	0	0	0	1	0	0	X500
2016-09-11 18:35:00	10	2	0	0	0	0	0	0	0	0	0	X500
2016-09-11 19:35:00	9	2	1	0	0	0	0	0	0	0	0	X500
2016-09-11 20:35:00	6	5	1	0	0	0	0	0	0	0	0	X500
2016-09-11 21:35:00	7	4	1	0	0	0	0	0	0	0	0	X500
2016-09-11 22:35:00	5	3	3	1	0	0	0	0	0	0	0	X500
2016-09-11 23:35:00	10	1	1	0	0	0	0	0	0	0	0	X500
2016-09-12 00:35:00	12	0	0	0	0	0	0	0	0	0	0	X500
2016-09-12 01:35:00	12	0	0	0	0	0	0	0	0	0	0	X500
2016-09-12 02:35:00	11	0	0	0	1	0	0	0	0	0	0	X500
2016-09-12 03:35:00	9	2	0	1	0	0	0	0	0	0	0	X500
2016-09-12 04:35:00	8	0	3	0	0	1	0	0	0	0	0	X500
2016-09-12 05:35:00	12	0	0	0	0	0	0	0	0	0	0	X500
2016-09-12 06:35:00	12	0	0	0	0	0	0	0	0	0	0	X500
2016-09-12 07:35:00	12	0	0	0	0	0	0	0	0	0	0	X500
2016-09-12 08:35:00	12	0	0	0	0	0	0	0	0	0	0	X500
2016-09-12 09:35:00	12	0	0	0	0	0	0	0	0	0	0	X500
2016-09-12 10:35:00	12	0	0	0	0	0	0	0	0	0	0	X500
2016-09-12 11:35:00	12	0	0	0	0	0	0	0	0	0	0	X500
2016-09-12 12:35:00	12	0	0	0	0	0	0	0	0	0	0	X500
2016-09-12 13:35:00	12	0	0	0	0	0	0	0	0	0	0	X500
2016-09-12 14:35:00	12	0	0	0	0	0	0	0	0	0	0	X500
2016-09-12 15:35:00	12	0	0	0	0	0	0	0	0	0	0	X500
2016-09-12 16:35:00	12	0	0	0	0	0	0	0	0	0	0	X500
2016-09-12 17:35:00	3	4	3	0	1	1	0	0	0	0	0	X500
2016-09-12 18:35:00	7	3	2	0	0	0	0	0	0	0	0	X500
2016-09-12 19:35:00	8	3	1	0	0	0	0	0	0	0	0	X500
2016-09-12 20:35:00	11	1	0	0	0	0	0	0	0	0	0	X500
2016-09-12 21:35:00	7	2	3	0	0	0	0	0	0	0	0	X500
2016-09-12 22:35:00	7	5	0	0	0	0	0	0	0	0	0	X500
2016-09-12 23:35:00	6	3	3	0	0	0	0	0	0	0	0	X500
2016-09-13 00:35:00	7	3	1	1	0	0	0	0	0	0	0	X500
2016-09-13 01:35:00	12	0	0	0	0	0	0	0	0	0	0	X500
2016-09-13 02:35:00	12	0	0	0	0	0	0	0	0	0	0	X500
2016-09-13 03:35:00	11	1	0	0	0	0	0	0	0	0	0	X500
2016-09-13 04:35:00	9	2	1	0	0	0	0	0	0	0	0	X500
2016-09-13 05:35:00	12	0	0	0	0	0	0	0	0	0	0	X500
2016-09-13 06:35:00	12	0	0	0	0	0	0	0	0	0	0	X500
2016-09-13 07:35:00	12	0	0	0	0	0	0	0	0	0	0	X500
2016-09-13 08:35:00	12	0	0	0	0	0	0	0	0	0	0	X500
2016-09-13 09:35:00	12	0	0	0	0	0	0	0	0	0	0	X500
2016-09-13 10:35:00	12	0	0	0	0	0	0	0	0	0	0	X500
2016-09-13 11:35:00	12	0	0	0	0	0	0	0	0	0	0	X500
2016-09-13 12:35:00	12	0	0	0	0	0	0	0	0	0	0	X500
2016-09-13 13:35:00	12	0	0	0	0	0	0	0	0	0	0	X500
2016-09-13 14:35:00	12	0	0	0	0	0	0	0	0	0	0	X500
2016-09-13 15:35:00	12	0	0	0	0	0	0	0	0	0	0	X500
2016-09-13 16:35:00	12	0	0	0	0	0	0	0	0	0	0	X500
2016-09-13 17:35:00	4	5	2	0	0	0	1	0	0	0	0	X500
2016-09-13 18:35:00	6	1	3	2	0	0	0	0	0	0	0	X500
2016-09-13 19:35:00	10	2	0	0	0	0	0	0	0	0	0	X500
2016-09-13 20:35:00	12	0	0	0	0	0	0	0	0	0	0	X500
2016-09-13 21:35:00	7	2	1	1	0	0	0	1	0	0	0	X500
2016-09-13 22:35:00	6	3	2	0	1	0	0	0	0	0	0	X500
2016-09-13 23:35:00	4	7	1	0	0	0	0	0	0	0	0	X500
2016-09-14 00:35:00	7	3	2	0	0	0	0	0	0	0	0	X500
2016-09-14 01:35:00	10	1	1	0	0	0	0	0	0	0	0	X500
2016-09-14 02:35:00	12	0	0	0	0	0	0	0	0	0	0	X500
2016-09-14 03:35:00	11	1	0	0	0	0	0	0	0	0	0	X500
2016-09-14 04:35:00	10	2	0	0	0	0	0	0	0	0	0	X500
2016-09-14 05:35:00	12	0	0	0	0	0	0	0	0	0	0	X500
2016-09-14 06:35:00	12	0	0	0	0	0	0	0	0	0	0	X500
2016-09-14 07:35:00	12	0	0	0	0	0	0	0	0	0	0	X500
2016-09-14 08:35:00	12	0	0	0	0	0	0	0	0	0	0	X500
2016-09-14 09:35:00	12	0	0	0	0	0	0	0	0	0	0	X500
2016-09-14 10:35:00	12	0	0	0	0	0	0	0	0	0	0	X500
2016-09-14 11:35:00	12	0	0	0	0	0	0	0	0	0	0	X500
2016-09-14 12:35:00	12	0	0	0	0	0	0	0	0	0	0	X500
2016-09-14 13:35:00	12	0	0	0	0	0	0	0	0	0	0	X500
2016-09-14 14:35:00	12	0	0	0	0	0	0	0	0	0	0	X500
2016-09-14 15:35:00	12	0	0	0	0	0	0	0	0	0	0	X500
2016-09-14 16:35:00	12	0	0	0	0	0	0	0	0	0	0	X500
2016-09-14 17:35:00	8	0	2	0	1	0	0	0	1	0	0	X500
2016-09-14 18:35:00	9	2	1	0	0	0	0	0	0	0	0	X500
2016-09-14 19:35:00	8	1	2	1	0	0	0	0	0	0	0	X500
2016-09-14 20:35:00	7	3	1	0	0	0	0	1	0	0	0	X500
2016-09-14 21:35:00	10	0	1	0	0	0	1	0	0	0	0	X500
2016-09-14 22:35:00	8	1	2	0	1	0	0	0	0	0	0	X500
2016-09-14 23:35:00	7	1	1	1	0	2	0	0	0	0	0	X500
2016-09-15 00:35:00	9	2	1	0	0	0	0	0	0	0	0	X500
2016-09-15 01:35:00	4	3	2	3	0	0	0	0	0	0	0	X500
2016-09-15 02:35:00	8	3	0	1	0	0	0	0	0	0	0	X500
2016-09-15 03:35:00	12	0	0	0	0	0	0	0	0	0	0	X500
2016-09-15 04:35:00	11	1	0	0	0	0	0	0	0	0	0	X500
2016-09-15 05:35:00	12	0	0	0	0	0	0	0	0	0	0	X500
2016-09-15 06:35:00	12	0	0	0	0	0	0	0	0	0	0	X500
2016-09-15 07:35:00	12	0	0	0	0	0	0	0	0	0	0	X500
2016-09-15 08:35:00	12	0	0	0	0	0	0	0	0	0	0	X500
2016-09-15 09:35:00	12	0	0	0	0	0	0	0	0	0	0	X500
2016-09-15 10:35:00	12	0	0	0	0	0	0	0	0	0	0	X500
2016-09-15 11:35:00	12	0	0	0	0	0	0	0	0	0	0	X500
2016-09-15 12:35:00	12	0	0	0	0	0	0	0	0	0	0	X500
2016-09-15 13:35:00	12	0	0	0	0	0	0	0	0	0	0	X500
2016-09-15 14:35:00	12	0	0	0	0	0	0	0	0	0	0	X500
2016-09-15 15:35:00	12	0	0	0	0	0	0	0	0	0	0	X500
2016-09-15 16:35:00	12	0	0	0	0	0	0	0	0	0	0	X500
2016-09-15 17:35:00	7	4	0	0	0	0	0	1	0	0	0	X500
2016-09-15 18:35:00	5	6	0	1	0	0	0	0	0	0	0	X500
2016-09-15 19:35:00	6	6	0	0	0	0	0	0	0	0	0	X500
2016-09-15 20:35:00	8	3	0	1	0	0	0	0	0	0	0	X500
2016-09-15 21:35:00	9	2	0	1	0	0	0	0	0	0	0	X500
2016-09-15 22:35:00	11	1	0	0	0	0	0	0	0	0	0	X500
2016-09-15 23:35:00	10	1	0	1	0	0	0	0	0	0	0	X500
2016-09-16 00:35:00	8	3	1	0	0	0	0	0	0	0	0	X500
2016-09-16 01:35:00	8	3	0	1	0	0	0	0	0	0	0	X500
2016-09-16 02:35:00	4	3	0	4	0	1	0	0	0	0	0	X500
2016-09-16 03:35:00	9	3	0	0	0	0	0	0	0	0	0	X500
2016-09-16 04:35:00	11	0	1	0	0	0	0	0	0	0	0	X500
2016-09-16 05:35:00	12	0	0	0	0	0	0	0	0	0	0	X500
2016-09-16 06:35:00	12	0	0	0	0	0	0	0	0	0	0	X500
2016-09-16 07:35:00	12	0	0	0	0	0	0	0	0	0	0	X500
2016-09-16 08:35:00	12	0	0	0	0	0	0	0	0	0	0	X500
2016-09-16 09:35:00	12	0	0	0	0	0	0	0	0	0	0	X500
2016-09-16 10:35:00	12	0	0	0	0	0	0	0	0	0	0	X500
2016-09-16 11:35:00	12	0	0	0	0	0	0	0	0	0	0	X500
2016-09-16 12:35:00	12	0	0	0	0	0	0	0	0	0	0	X500
2016-09-16 13:35:00	12	0	0	0	0	0	0	0	0	0	0	X500
2016-09-16 14:35:00	12	0	0	0	0	0	0	0	0	0	0	X500
2016-09-16 15:35:00	12	0	0	0	0	0	0	0	0	0	0	X500
2016-09-16 16:35:00	12	0	0	0	0	0	0	0	0	0	0	X500
2016-09-16 17:35:00	7	1	3	0	0	0	1	0	0	0	0	X500
2016-09-16 18:35:00	9	3	0	0	0	0	0	0	0	0	0	X500
2016-09-16 19:35:00	9	2	1	0	0	0	0	0	0	0	0	X500
2016-09-16 20:35:00	8	2	1	1	0	0	0	0	0	0	0	X500
2016-09-16 21:35:00	8	4	0	0	0	0	0	0	0	0	0	X500
2016-09-16 22:35:00	9	2	1	0	0	0	0	0	0	0	0	X500
2016-09-16 23:35:00	7	4	0	0	1	0	0	0	0	0	0	X500
2016-09-17 00:35:00	7	4	1	0	0	0	0	0	0	0	0	X500
2016-09-17 01:35:00	9	2	1	0	0	0	0	0	0	0	0	X500
2016-09-17 02:35:00	8	2	2	0	0	0	0	0	0	0	0	X500
2016-09-17 03:35:00	7	4	1	0	0	0	0	0	0	0	0	X500
2016-09-17 04:35:00	11	0	1	0	0	0	0	0	0	0	0	X500
2016-09-17 05:35:00	12	0	0	0	0	0	0	0	0	0	0	X500
2016-09-17 06:35:00	12	0	0	0	0	0	0	0	0	0	0	X500
2016-09-17 07:35:00	12	0	0	0	0	0	0	0	0	0	0	X500
2016-09-17 08:35:00	12	0	0	0	0	0	0	0	0	0	0	X500
2016-09-17 09:35:00	12	0	0	0	0	0	0	0	0	0	0	X500
2016-09-17 10:35:00	12	0	0	0	0	0	0	0	0	0	0	X500
2016-09-17 11:35:00	12	0	0	0	0	0	0	0	0	0	0	X500
2016-09-17 12:35:00	12	0	0	0	0	0	0	0	0	0	0	X500
2016-09-17 13:35:00	12	0	0	0	0	0	0	0	0	0	0	X500
2016-09-17 14:35:00	12	0	0	0	0	0	0	0	0	0	0	X500
2016-09-17 15:35:00	12	0	0	0	0	0	0	0	0	0	0	X500
2016-09-17 16:35:00	11	1	0	0	0	0	0	0	0	0	0	X500
2016-09-17 17:35:00	4	3	3	1	0	0	1	0	0	0	0	X500
2016-09-17 18:35:00	8	3	0	1	0	0	0	0	0	0	0	X500
2016-09-17 19:35:00	9	2	1	0	0	0	0	0	0	0	0	X500
2016-09-17 20:35:00	10	2	0	0	0	0	0	0	0	0	0	X500
2016-09-17 21:35:00	7	2	2	0	0	0	0	1	0	0	0	X500
2016-09-17 22:35:00	8	1	1	2	0	0	0	0	0	0	0	X500
2016-09-17 23:35:00	7	1	1	2	1	0	0	0	0	0	0	X500
2016-09-18 00:35:00	7	3	2	0	0	0	0	0	0	0	0	X500
2016-09-18 01:35:00	8	2	1	0	1	0	0	0	0	0	0	X500
2016-09-18 02:35:00	2	4	4	2	0	0	0	0	0	0	0	X500
2016-09-18 03:35:00	11	1	0	0	0	0	0	0	0	0	0	X500
2016-09-18 04:35:00	11	0	1	0	0	0	0	0	0	0	0	X500
2016-09-18 05:35:00	12	0	0	0	0	0	0	0	0	0	0	X500
2016-09-18 06:35:00	12	0	0	0	0	0	0	0	0	0	0	X500
2016-09-18 07:35:00	12	0	0	0	0	0	0	0	0	0	0	X500
2016-09-18 08:35:00	12	0	0	0	0	0	0	0	0	0	0	X500
2016-09-18 09:35:00	12	0	0	0	0	0	0	0	0	0	0	X500
2016-09-18 10:35:00	12	0	0	0	0	0	0	0	0	0	0	X500
2016-09-18 11:35:00	12	0	0	0	0	0	0	0	0	0	0	X500
2016-09-18 12:35:00	12	0	0	0	0	0	0	0	0	0	0	X500
2016-09-18 13:35:00	11	1	0	0	0	0	0	0	0	0	0	X500
2016-09-18 14:35:00	12	0	0	0	0	0	0	0	0	0	0	X500
2016-09-18 15:35:00	12	0	0	0	0	0	0	0	0	0	0	X500
2016-09-18 16:35:00	12	0	0	0	0	0	0	0	0	0	0	X500
2016-09-18 17:35:00	7	1	2	0	0	1	0	0	0	1	0	X500
2016-09-18 18:35:00	10	1	1	0	0	0	0	0	0	0	0	X500
2016-09-18 19:35:00	7	3	1	0	0	0	1	0	0	0	0	X500
2016-09-18 20:35:00	8	2	1	1	0	0	0	0	0	0	0	X500
2016-09-18 21:35:00	9	3	0	0	0	0	0	0	0	0	0	X500
2016-09-18 22:35:00	11	0	1	0	0	0	0	0	0	0	0	X500
2016-09-18 23:35:00	8	3	0	1	0	0	0	0	0	0	0	X500
2016-09-19 00:35:00	6	3	3	0	0	0	0	0	0	0	0	X500
2016-09-19 01:35:00	9	3	0	0	0	0	0	0	0	0	0	X500
2016-09-19 02:35:00	9	2	1	0	0	0	0	0	0	0	0	X500
2016-09-19 03:35:00	9	1	2	0	0	0	0	0	0	0	0	X500
2016-09-19 04:35:00	10	2	0	0	0	0	0	0	0	0	0	X500
2016-09-19 05:35:00	12	0	0	0	0	0	0	0	0	0	0	X500
2016-09-19 06:35:00	12	0	0	0	0	0	0	0	0	0	0	X500
2016-09-19 07:35:00	12	0	0	0	0	0	0	0	0	0	0	X500
2016-09-19 08:35:00	12	0	0	0	0	0	0	0	0	0	0	X500
2016-09-19 09:35:00	12	0	0	0	0	0	0	0	0	0	0	X500
2016-09-19 10:35:00	12	0	0	0	0	0	0	0	0	0	0	X500
2016-09-19 11:35:00	12	0	0	0	0	0	0	0	0	0	0	X500
2016-09-19 12:35:00	12	0	0	0	0	0	0	0	0	0	0	X500
2016-09-19 13:35:00	12	0	0	0	0	0	0	0	0	0	0	X500
2016-09-19 14:35:00	12	0	0	0	0	0	0	0	0	0	0	X500
2016-09-19 15:35:00	12	0	0	0	0	0	0	0	0	0	0	X500
2016-09-19 16:35:00	11	0	0	0	0	0	0	0	1	0	0	X500
2016-09-19 17:35:00	7	1	2	0	1	0	0	1	0	0	0	X500
2016-09-19 18:35:00	12	0	0	0	0	0	0	0	0	0	0	X500
2016-09-19 19:35:00	11	1	0	0	0	0	0	0	0	0	0	X500
2016-09-19 20:35:00	10	2	0	0	0	0	0	0	0	0	0	X500
2016-09-19 21:35:00	6	6	0	0	0	0	0	0	0	0	0	X500
2016-09-19 22:35:00	8	2	0	1	0	0	0	1	0	0	0	X500
2016-09-19 23:35:00	7	3	0	1	1	0	0	0	0	0	0	X500
2016-09-20 00:35:00	12	0	0	0	0	0	0	0	0	0	0	X500
2016-09-20 01:35:00	7	2	2	0	0	1	0	0	0	0	0	X500
2016-09-20 02:35:00	8	4	0	0	0	0	0	0	0	0	0	X500
2016-09-20 03:35:00	8	3	1	0	0	0	0	0	0	0	0	X500
2016-09-20 04:35:00	10	0	1	0	0	0	0	1	0	0	0	X500
2016-09-20 05:35:00	12	0	0	0	0	0	0	0	0	0	0	X500
2016-09-20 06:35:00	12	0	0	0	0	0	0	0	0	0	0	X500
2016-09-20 07:35:00	12	0	0	0	0	0	0	0	0	0	0	X500
2016-09-20 08:35:00	12	0	0	0	0	0	0	0	0	0	0	X500
2016-09-20 09:35:00	12	0	0	0	0	0	0	0	0	0	0	X500
2016-09-20 10:35:00	12	0	0	0	0	0	0	0	0	0	0	X500
2016-09-20 11:35:00	12	0	0	0	0	0	0	0	0	0	0	X500
2016-09-20 12:35:00	11	1	0	0	0	0	0	0	0	0	0	X500
2016-09-20 13:35:00	12	0	0	0	0	0	0	0	0	0	0	X500
2016-09-20 14:35:00	12	0	0	0	0	0	0	0	0	0	0	X500
2016-09-20 15:35:00	12	0	0	0	0	0	0	0	0	0	0	X500
2016-09-20 16:35:00	11	0	0	0	0	0	0	1	0	0	0	X500
2016-09-20 17:35:00	8	0	2	0	0	0	0	2	0	0	0	X500
2016-09-20 18:35:00	10	0	0	1	1	0	0	0	0	0	0	X500
2016-09-20 19:35:00	12	0	0	0	0	0	0	0	0	0	0	X500
2016-09-20 20:35:00	9	3	0	0	0	0	0	0	0	0	0	X500
2016-09-20 21:35:00	11	0	1	0	0	0	0	0	0	0	0	X500
2016-09-20 22:35:00	7	3	1	1	0	0	0	0	0	0	0	X500
2016-09-20 23:35:00	8	1	1	1	1	0	0	0	0	0	0	X500
2016-09-21 00:35:00	5	6	0	0	0	1	0	0	0	0	0	X500
2016-09-21 01:35:00	7	2	3	0	0	0	0	0	0	0	0	X500
2016-09-21 02:35:00	6	2	2	1	1	0	0	0	0	0	0	X500
2016-09-21 03:35:00	6	5	1	0	0	0	0	0	0	0	0	X500
2016-09-21 04:35:00	10	0	1	0	0	0	1	0	0	0	0	X500
2016-09-21 05:35:00	12	0	0	0	0	0	0	0	0	0	0	X500
2016-09-21 06:35:00	12	0	0	0	0	0	0	0	0	0	0	X500
2016-09-21 07:35:00	12	0	0	0	0	0	0	0	0	0	0	X500
2016-09-21 08:35:00	12	0	0	0	0	0	0	0	0	0	0	X500
2016-09-21 09:35:00	12	0	0	0	0	0	0	0	0	0	0	X500
2016-09-21 10:35:00	12	0	0	0	0	0	0	0	0	0	0	X500
2016-09-21 11:35:00	12	0	0	0	0	0	0	0	0	0	0	X500
2016-09-21 12:35:00	12	0	0	0	0	0	0	0	0	0	0	X500
2016-09-21 13:35:00	12	0	0	0	0	0	0	0	0	0	0	X500
2016-09-21 14:35:00	12	0	0	0	0	0	0	0	0	0	0	X500
2016-09-21 15:35:00	12	0	0	0	0	0	0	0	0	0	0	X500
2016-09-21 16:35:00	12	0	0	0	0	0	0	0	0	0	0	X500
2016-09-21 17:35:00	3	1	1	0	1	0	0	0	1	0	5	X500
2016-09-21 18:35:00	0	0	0	0	0	0	0	0	0	0	12	X500
2016-09-21 19:35:00	0	0	0	0	0	0	0	1	0	1	10	X500
2016-09-21 20:35:00	0	0	0	0	0	0	0	0	0	0	12	X500
2016-09-21 21:35:00	0	0	0	0	0	0	0	0	1	0	11	X500
2016-09-21 22:35:00	0	0	0	0	0	0	0	0	0	3	9	X500
2016-09-21 23:35:00	0	0	0	0	0	0	0	0	0	1	11	X500
2016-09-22 00:35:00	0	0	0	0	0	0	0	0	0	0	12	X500
2016-09-22 01:35:00	0	0	0	0	0	0	0	0	0	1	11	X500
2016-09-22 02:35:00	0	0	0	0	1	0	0	0	2	1	8	X500
2016-09-22 03:35:00	0	0	0	0	0	0	0	0	1	2	9	X500
2016-09-22 04:35:00	10	1	0	0	0	0	1	0	0	0	0	X500
2016-09-22 05:35:00	11	1	0	0	0	0	0	0	0	0	0	X500
2016-09-22 06:35:00	11	1	0	0	0	0	0	0	0	0	0	X500
2016-09-22 07:35:00	12	0	0	0	0	0	0	0	0	0	0	X500
2016-09-22 08:35:00	12	0	0	0	0	0	0	0	0	0	0	X500
2016-09-22 09:35:00	12	0	0	0	0	0	0	0	0	0	0	X500
2016-09-22 10:35:00	12	0	0	0	0	0	0	0	0	0	0	X500
2016-09-22 11:35:00	12	0	0	0	0	0	0	0	0	0	0	X500
2016-09-22 12:35:00	12	0	0	0	0	0	0	0	0	0	0	X500
2016-09-22 13:35:00	12	0	0	0	0	0	0	0	0	0	0	X500
2016-09-22 14:35:00	12	0	0	0	0	0	0	0	0	0	0	X500
2016-09-22 15:35:00	12	0	0	0	0	0	0	0	0	0	0	X500
2016-09-22 16:35:00	12	0	0	0	0	0	0	0	0	0	0	X500
2016-09-22 17:35:00	3	2	1	0	0	0	0	3	0	0	3	X500
2016-09-22 18:35:00	0	0	0	1	0	1	0	0	1	1	8	X500
2016-09-22 19:35:00	0	0	0	0	0	0	0	0	0	1	11	X500
2016-09-22 20:35:00	0	0	0	0	0	0	0	0	0	1	11	X500
2016-09-22 21:35:00	0	0	0	0	0	0	0	0	0	2	10	X500
2016-09-22 22:35:00	0	0	0	1	0	0	0	0	0	0	11	X500
2016-09-22 23:35:00	0	0	0	0	0	0	0	0	0	0	12	X500
2016-09-23 00:35:00	0	0	0	0	0	0	0	0	0	0	12	X500
2016-09-23 01:35:00	0	0	0	0	0	0	0	0	0	0	12	X500
2016-09-23 02:35:00	0	0	0	0	0	0	0	0	0	0	12	X500
2016-09-23 03:35:00	5	1	0	0	1	0	0	1	0	0	4	X500
2016-09-23 04:35:00	10	0	0	1	0	0	1	0	0	0	0	X500
2016-09-23 05:35:00	12	0	0	0	0	0	0	0	0	0	0	X500
2016-09-23 06:35:00	12	0	0	0	0	0	0	0	0	0	0	X500
2016-09-23 07:35:00	12	0	0	0	0	0	0	0	0	0	0	X500
2016-09-23 08:35:00	12	0	0	0	0	0	0	0	0	0	0	X500
2016-09-23 09:35:00	12	0	0	0	0	0	0	0	0	0	0	X500
2016-09-23 10:35:00	12	0	0	0	0	0	0	0	0	0	0	X500
2016-09-23 11:35:00	12	0	0	0	0	0	0	0	0	0	0	X500
2016-09-23 12:35:00	12	0	0	0	0	0	0	0	0	0	0	X500
2016-09-23 13:35:00	12	0	0	0	0	0	0	0	0	0	0	X500
2016-09-23 14:35:00	12	0	0	0	0	0	0	0	0	0	0	X500
2016-09-23 15:35:00	12	0	0	0	0	0	0	0	0	0	0	X500
2016-09-23 16:35:00	11	0	0	1	0	0	0	0	0	0	0	X500
2016-09-23 17:35:00	5	0	2	1	1	0	0	0	1	0	2	X500
2016-09-23 18:35:00	0	0	0	0	0	0	0	0	0	0	12	X500
2016-09-23 19:35:00	0	0	0	0	0	0	0	0	0	0	12	X500
2016-09-23 20:35:00	0	0	0	0	0	0	0	0	1	2	9	X500
2016-09-23 21:35:00	0	0	0	0	0	0	0	0	0	1	11	X500
2016-09-23 22:35:00	0	0	0	0	0	0	0	0	0	0	12	X500
2016-09-23 23:35:00	0	0	0	0	0	0	0	0	0	0	12	X500
2016-09-24 00:35:00	0	0	0	0	0	0	0	0	0	0	12	X500
2016-09-24 01:35:00	0	0	0	0	0	0	0	0	0	0	12	X500
2016-09-24 02:35:00	0	0	0	0	0	0	0	0	0	0	12	X500
2016-09-24 03:35:00	0	0	0	0	0	0	0	0	0	0	12	X500
2016-09-24 04:35:00	8	0	1	1	0	1	0	0	0	0	1	X500
2016-09-24 05:35:00	12	0	0	0	0	0	0	0	0	0	0	X500
2016-09-24 06:35:00	12	0	0	0	0	0	0	0	0	0	0	X500
2016-09-24 07:35:00	12	0	0	0	0	0	0	0	0	0	0	X500
2016-09-24 08:35:00	12	0	0	0	0	0	0	0	0	0	0	X500
2016-09-24 09:35:00	12	0	0	0	0	0	0	0	0	0	0	X500
2016-09-24 10:35:00	12	0	0	0	0	0	0	0	0	0	0	X500
2016-09-24 11:35:00	12	0	0	0	0	0	0	0	0	0	0	X500
2016-09-24 12:35:00	12	0	0	0	0	0	0	0	0	0	0	X500
2016-09-24 13:35:00	12	0	0	0	0	0	0	0	0	0	0	X500
2016-09-24 14:35:00	12	0	0	0	0	0	0	0	0	0	0	X500
2016-09-24 15:35:00	12	0	0	0	0	0	0	0	0	0	0	X500
2016-09-24 16:35:00	12	0	0	0	0	0	0	0	0	0	0	X500
2016-09-24 17:35:00	4	2	0	1	0	0	0	1	0	0	4	X500
2016-09-24 18:35:00	0	0	0	0	0	0	0	0	1	0	11	X500
2016-09-24 19:35:00	0	0	0	0	0	0	0	0	0	0	12	X500
2016-09-24 20:35:00	0	0	0	0	0	0	0	0	0	0	12	X500
2016-09-24 21:35:00	0	0	0	0	0	0	0	0	1	0	11	X500
2016-09-24 22:35:00	0	0	0	0	0	0	0	0	1	1	10	X500
2016-09-24 23:35:00	0	0	0	0	0	0	0	0	0	0	12	X500
2016-09-25 00:35:00	0	0	0	0	0	0	0	0	0	0	12	X500
2016-09-25 01:35:00	0	0	0	0	0	0	0	0	0	2	10	X500
2016-09-25 02:35:00	0	0	0	0	0	0	0	0	0	1	11	X500
2016-09-25 03:35:00	0	0	0	0	0	0	0	2	1	1	8	X500
2016-09-25 04:35:00	6	2	2	1	0	0	0	1	0	0	0	X500
2016-09-25 05:35:00	12	0	0	0	0	0	0	0	0	0	0	X500
2016-09-25 06:35:00	12	0	0	0	0	0	0	0	0	0	0	X500
2016-09-25 07:35:00	12	0	0	0	0	0	0	0	0	0	0	X500
2016-09-25 08:35:00	12	0	0	0	0	0	0	0	0	0	0	X500
2016-09-25 09:35:00	12	0	0	0	0	0	0	0	0	0	0	X500
2016-09-25 10:35:00	12	0	0	0	0	0	0	0	0	0	0	X500
2016-09-25 11:35:00	12	0	0	0	0	0	0	0	0	0	0	X500
2016-09-25 12:35:00	12	0	0	0	0	0	0	0	0	0	0	X500
2016-09-25 13:35:00	12	0	0	0	0	0	0	0	0	0	0	X500
2016-09-25 14:35:00	12	0	0	0	0	0	0	0	0	0	0	X500
2016-09-25 15:35:00	12	0	0	0	0	0	0	0	0	0	0	X500
2016-09-25 16:35:00	11	1	0	0	0	0	0	0	0	0	0	X500
2016-09-25 17:35:00	4	1	0	1	0	1	0	0	0	0	5	X500
2016-09-25 18:35:00	0	0	0	0	0	0	0	0	0	1	11	X500
2016-09-25 19:35:00	0	0	0	0	0	0	0	0	0	1	11	X500
2016-09-25 20:35:00	0	0	0	0	0	0	0	0	0	2	10	X500
2016-09-25 21:35:00	0	0	0	0	0	0	1	0	0	0	11	X500
2016-09-25 22:35:00	0	0	0	0	0	0	0	1	0	1	10	X500
2016-09-25 23:35:00	0	0	0	0	0	0	0	0	0	0	12	X500
2016-09-26 00:35:00	0	0	0	0	0	0	0	0	0	0	12	X500
2016-09-26 01:35:00	0	0	0	0	0	0	0	0	0	1	11	X500
2016-09-26 02:35:00	0	0	0	0	0	0	0	0	0	0	12	X500
2016-09-26 03:35:00	0	0	1	1	1	0	0	3	0	3	3	X500
2016-09-26 04:35:00	10	0	1	1	0	0	0	0	0	0	0	X500
2016-09-26 05:35:00	12	0	0	0	0	0	0	0	0	0	0	X500
2016-09-26 06:35:00	12	0	0	0	0	0	0	0	0	0	0	X500
2016-09-26 07:35:00	12	0	0	0	0	0	0	0	0	0	0	X500
2016-09-26 08:35:00	12	0	0	0	0	0	0	0	0	0	0	X500
2016-09-26 09:35:00	12	0	0	0	0	0	0	0	0	0	0	X500
2016-09-26 10:35:00	12	0	0	0	0	0	0	0	0	0	0	X500
2016-09-26 11:35:00	12	0	0	0	0	0	0	0	0	0	0	X500
2016-09-26 12:35:00	12	0	0	0	0	0	0	0	0	0	0	X500
2016-09-26 13:35:00	12	0	0	0	0	0	0	0	0	0	0	X500
2016-09-26 14:35:00	12	0	0	0	0	0	0	0	0	0	0	X500
2016-09-26 15:35:00	12	0	0	0	0	0	0	0	0	0	0	X500
2016-09-26 16:35:00	10	0	0	0	0	1	0	0	1	0	0	X500
2016-09-26 17:35:00	7	2	2	0	0	0	0	0	0	1	0	X500
2016-09-26 18:35:00	6	0	0	0	0	0	0	0	0	1	5	X500
2016-09-26 19:35:00	0	0	0	0	0	0	0	0	0	0	12	X500
2016-09-26 20:35:00	0	0	0	0	0	0	0	0	0	1	11	X500
2016-09-26 21:35:00	0	0	0	0	0	0	0	0	0	1	11	X500
2016-09-26 22:35:00	0	0	0	0	0	0	0	0	0	0	12	X500
2016-09-26 23:35:00	0	0	0	0	0	0	0	0	0	1	11	X500
2016-09-27 00:35:00	0	0	0	1	0	1	0	0	1	2	7	X500
2016-09-27 01:35:00	10	1	0	0	0	0	0	1	0	0	0	X500
2016-09-27 02:35:00	12	0	0	0	0	0	0	0	0	0	0	X500
2016-09-27 03:35:00	12	0	0	0	0	0	0	0	0	0	0	X500
2016-09-27 04:35:00	8	2	1	0	0	0	1	0	0	0	0	X500
2016-09-27 05:35:00	12	0	0	0	0	0	0	0	0	0	0	X500
2016-09-27 06:35:00	12	0	0	0	0	0	0	0	0	0	0	X500
2016-09-27 07:35:00	12	0	0	0	0	0	0	0	0	0	0	X500
2016-09-27 08:35:00	12	0	0	0	0	0	0	0	0	0	0	X500
2016-09-27 09:35:00	12	0	0	0	0	0	0	0	0	0	0	X500
2016-09-27 10:35:00	12	0	0	0	0	0	0	0	0	0	0	X500
2016-09-27 11:35:00	12	0	0	0	0	0	0	0	0	0	0	X500
2016-09-27 12:35:00	12	0	0	0	0	0	0	0	0	0	0	X500
2016-09-27 13:35:00	12	0	0	0	0	0	0	0	0	0	0	X500
2016-09-27 14:35:00	12	0	0	0	0	0	0	0	0	0	0	X500
2016-09-27 15:35:00	12	0	0	0	0	0	0	0	0	0	0	X500
2016-09-27 16:35:00	9	0	0	0	0	0	0	2	1	0	0	X500
2016-09-27 17:35:00	9	2	0	1	0	0	0	0	0	0	0	X500
2016-09-27 18:35:00	12	0	0	0	0	0	0	0	0	0	0	X500
2016-09-27 19:35:00	12	0	0	0	0	0	0	0	0	0	0	X500
2016-09-27 20:35:00	12	0	0	0	0	0	0	0	0	0	0	X500
2016-09-27 21:35:00	12	0	0	0	0	0	0	0	0	0	0	X500
2016-09-27 22:35:00	12	0	0	0	0	0	0	0	0	0	0	X500
2016-09-27 23:35:00	12	0	0	0	0	0	0	0	0	0	0	X500
2016-09-28 00:35:00	12	0	0	0	0	0	0	0	0	0	0	X500
2016-09-28 01:35:00	12	0	0	0	0	0	0	0	0	0	0	X500
2016-09-28 02:35:00	12	0	0	0	0	0	0	0	0	0	0	X500
2016-09-28 03:35:00	10	0	0	1	0	0	1	0	0	0	0	X500
2016-09-28 04:35:00	9	0	0	0	0	0	0	2	1	0	0	X500
2016-09-28 05:35:00	12	0	0	0	0	0	0	0	0	0	0	X500
2016-09-28 06:35:00	12	0	0	0	0	0	0	0	0	0	0	X500
2016-09-28 07:35:00	12	0	0	0	0	0	0	0	0	0	0	X500
2016-09-28 08:35:00	12	0	0	0	0	0	0	0	0	0	0	X500
2016-09-28 09:35:00	12	0	0	0	0	0	0	0	0	0	0	X500
2016-09-28 10:35:00	12	0	0	0	0	0	0	0	0	0	0	X500
2016-09-28 11:35:00	12	0	0	0	0	0	0	0	0	0	0	X500
2016-09-28 12:35:00	12	0	0	0	0	0	0	0	0	0	0	X500
2016-09-28 13:35:00	12	0	0	0	0	0	0	0	0	0	0	X500
2016-09-28 14:35:00	12	0	0	0	0	0	0	0	0	0	0	X500
2016-09-28 15:35:00	12	0	0	0	0	0	0	0	0	0	0	X500
2016-09-28 16:35:00	4	3	0	0	0	1	1	1	2	0	0	X500
2016-09-28 17:35:00	11	1	0	0	0	0	0	0	0	0	0	X500
2016-09-28 18:35:00	12	0	0	0	0	0	0	0	0	0	0	X500
2016-09-28 19:35:00	12	0	0	0	0	0	0	0	0	0	0	X500
2016-09-28 20:35:00	12	0	0	0	0	0	0	0	0	0	0	X500
2016-09-28 21:35:00	12	0	0	0	0	0	0	0	0	0	0	X500
2016-09-28 22:35:00	11	1	0	0	0	0	0	0	0	0	0	X500
2016-09-28 23:35:00	12	0	0	0	0	0	0	0	0	0	0	X500
2016-09-29 00:35:00	12	0	0	0	0	0	0	0	0	0	0	X500
2016-09-29 01:35:00	12	0	0	0	0	0	0	0	0	0	0	X500
2016-09-29 02:35:00	12	0	0	0	0	0	0	0	0	0	0	X500
2016-09-29 03:35:00	12	0	0	0	0	0	0	0	0	0	0	X500
2016-09-29 04:35:00	10	2	0	0	0	0	0	0	0	0	0	X500
2016-09-29 05:35:00	12	0	0	0	0	0	0	0	0	0	0	X500
2016-09-29 06:35:00	12	0	0	0	0	0	0	0	0	0	0	X500
2016-09-29 07:35:00	12	0	0	0	0	0	0	0	0	0	0	X500
2016-09-29 08:35:00	12	0	0	0	0	0	0	0	0	0	0	X500
2016-09-29 09:35:00	12	0	0	0	0	0	0	0	0	0	0	X500
2016-09-29 10:35:00	12	0	0	0	0	0	0	0	0	0	0	X500
2016-09-29 11:35:00	12	0	0	0	0	0	0	0	0	0	0	X500
2016-09-29 12:35:00	12	0	0	0	0	0	0	0	0	0	0	X500
2016-09-29 13:35:00	12	0	0	0	0	0	0	0	0	0	0	X500
2016-09-29 14:35:00	12	0	0	0	0	0	0	0	0	0	0	X500
2016-09-29 15:35:00	10	2	0	0	0	0	0	0	0	0	0	X500
2016-09-29 16:35:00	8	1	2	0	0	1	0	0	0	0	0	X500
2016-09-29 17:35:00	10	0	1	0	1	0	0	0	0	0	0	X500
2016-09-29 18:35:00	7	0	0	0	0	0	0	0	0	0	5	X500
2016-09-29 19:35:00	0	0	0	0	0	0	0	0	0	0	12	X500
2016-09-29 20:35:00	0	0	0	0	0	0	0	0	0	4	8	X500
2016-09-29 21:35:00	0	0	0	0	0	1	0	0	0	1	10	X500
2016-09-29 22:35:00	0	0	0	0	0	0	0	0	1	0	11	X500
2016-09-29 23:35:00	0	0	0	0	0	0	0	0	0	2	10	X500
2016-09-30 00:35:00	0	0	0	0	0	0	0	1	1	1	9	X500
2016-09-30 01:35:00	0	0	0	0	0	1	3	0	1	1	6	X500
2016-09-30 02:35:00	11	0	0	0	0	1	0	0	0	0	0	X500
2016-09-30 03:35:00	10	0	0	1	1	0	0	0	0	0	0	X500
2016-09-30 04:35:00	11	1	0	0	0	0	0	0	0	0	0	X500
2016-09-30 05:35:00	12	0	0	0	0	0	0	0	0	0	0	X500
2016-09-30 06:35:00	12	0	0	0	0	0	0	0	0	0	0	X500
2016-09-30 07:35:00	12	0	0	0	0	0	0	0	0	0	0	X500
2016-09-30 08:35:00	12	0	0	0	0	0	0	0	0	0	0	X500
2016-09-30 09:35:00	12	0	0	0	0	0	0	0	0	0	0	X500
2016-09-30 10:35:00	11	1	0	0	0	0	0	0	0	0	0	X500
2016-09-30 11:35:00	12	0	0	0	0	0	0	0	0	0	0	X500
2016-09-30 12:35:00	12	0	0	0	0	0	0	0	0	0	0	X500
2016-09-30 13:35:00	12	0	0	0	0	0	0	0	0	0	0	X500
2016-09-30 14:35:00	12	0	0	0	0	0	0	0	0	0	0	X500
2016-09-30 15:35:00	12	0	0	0	0	0	0	0	0	0	0	X500
2016-09-30 16:35:00	9	1	0	2	0	0	0	0	0	0	0	X500
2016-09-30 17:35:00	10	1	0	1	0	0	0	0	0	0	0	X500
2016-09-30 18:35:00	12	0	0	0	0	0	0	0	0	0	0	X500
2016-09-30 19:35:00	12	0	0	0	0	0	0	0	0	0	0	X500
2016-09-30 20:35:00	12	0	0	0	0	0	0	0	0	0	0	X500
2016-09-30 21:35:00	12	0	0	0	0	0	0	0	0	0	0	X500
2016-09-30 22:35:00	12	0	0	0	0	0	0	0	0	0	0	X500
2016-09-30 23:35:00	12	0	0	0	0	0	0	0	0	0	0	X500
2016-10-01 00:35:00	12	0	0	0	0	0	0	0	0	0	0	X500
2016-10-01 01:35:00	12	0	0	0	0	0	0	0	0	0	0	X500
2016-10-01 02:35:00	12	0	0	0	0	0	0	0	0	0	0	X500
2016-10-01 03:35:00	11	1	0	0	0	0	0	0	0	0	0	X500
2016-10-01 04:35:00	11	0	0	0	1	0	0	0	0	0	0	X500
2016-10-01 05:35:00	12	0	0	0	0	0	0	0	0	0	0	X500
2016-10-01 06:35:00	12	0	0	0	0	0	0	0	0	0	0	X500
2016-10-01 07:35:00	12	0	0	0	0	0	0	0	0	0	0	X500
2016-10-01 08:35:00	12	0	0	0	0	0	0	0	0	0	0	X500
2016-10-01 09:35:00	12	0	0	0	0	0	0	0	0	0	0	X500
2016-10-01 10:35:00	12	0	0	0	0	0	0	0	0	0	0	X500
2016-10-01 11:35:00	12	0	0	0	0	0	0	0	0	0	0	X500
2016-10-01 12:35:00	12	0	0	0	0	0	0	0	0	0	0	X500
2016-10-01 13:35:00	12	0	0	0	0	0	0	0	0	0	0	X500
2016-10-01 14:35:00	12	0	0	0	0	0	0	0	0	0	0	X500
2016-10-01 15:35:00	12	0	0	0	0	0	0	0	0	0	0	X500
2016-10-01 16:35:00	9	0	1	1	1	0	0	0	0	0	0	X500
2016-10-01 17:35:00	9	2	0	0	1	0	0	0	0	0	0	X500
2016-10-01 18:35:00	12	0	0	0	0	0	0	0	0	0	0	X500
2016-10-01 19:35:00	12	0	0	0	0	0	0	0	0	0	0	X500
2016-10-01 20:35:00	12	0	0	0	0	0	0	0	0	0	0	X500
2016-10-01 21:35:00	12	0	0	0	0	0	0	0	0	0	0	X500
2016-10-01 22:35:00	12	0	0	0	0	0	0	0	0	0	0	X500
2016-10-01 23:35:00	12	0	0	0	0	0	0	0	0	0	0	X500
2016-10-02 00:35:00	11	0	0	1	0	0	0	0	0	0	0	X500
2016-10-02 01:35:00	12	0	0	0	0	0	0	0	0	0	0	X500
2016-10-02 02:35:00	12	0	0	0	0	0	0	0	0	0	0	X500
2016-10-02 03:35:00	9	2	1	0	0	0	0	0	0	0	0	X500
2016-10-02 04:35:00	9	2	0	0	0	1	0	0	0	0	0	X500
2016-10-02 05:35:00	12	0	0	0	0	0	0	0	0	0	0	X500
2016-10-02 06:35:00	12	0	0	0	0	0	0	0	0	0	0	X500
2016-10-02 07:35:00	12	0	0	0	0	0	0	0	0	0	0	X500
2016-10-02 08:35:00	12	0	0	0	0	0	0	0	0	0	0	X500
2016-10-02 09:35:00	12	0	0	0	0	0	0	0	0	0	0	X500
2016-10-02 10:35:00	12	0	0	0	0	0	0	0	0	0	0	X500
2016-10-02 11:35:00	12	0	0	0	0	0	0	0	0	0	0	X500
2016-10-02 12:35:00	12	0	0	0	0	0	0	0	0	0	0	X500
2016-10-02 13:35:00	12	0	0	0	0	0	0	0	0	0	0	X500
2016-10-02 14:35:00	12	0	0	0	0	0	0	0	0	0	0	X500
2016-10-02 15:35:00	12	0	0	0	0	0	0	0	0	0	0	X500
2016-10-02 16:35:00	9	0	0	2	1	0	0	0	0	0	0	X500
2016-10-02 17:35:00	10	0	1	0	1	0	0	0	0	0	0	X500
2016-10-02 18:35:00	12	0	0	0	0	0	0	0	0	0	0	X500
2016-10-02 19:35:00	12	0	0	0	0	0	0	0	0	0	0	X500
2016-10-02 20:35:00	12	0	0	0	0	0	0	0	0	0	0	X500
2016-10-02 21:35:00	12	0	0	0	0	0	0	0	0	0	0	X500
2016-10-02 22:35:00	12	0	0	0	0	0	0	0	0	0	0	X500
2016-10-02 23:35:00	12	0	0	0	0	0	0	0	0	0	0	X500
2016-10-03 00:35:00	12	0	0	0	0	0	0	0	0	0	0	X500
2016-10-03 01:35:00	12	0	0	0	0	0	0	0	0	0	0	X500
2016-10-03 02:35:00	12	0	0	0	0	0	0	0	0	0	0	X500
2016-10-03 03:35:00	12	0	0	0	0	0	0	0	0	0	0	X500
2016-10-03 04:35:00	10	1	0	1	0	0	0	0	0	0	0	X500
2016-10-03 05:35:00	12	0	0	0	0	0	0	0	0	0	0	X500
2016-10-03 06:35:00	12	0	0	0	0	0	0	0	0	0	0	X500
2016-10-03 07:35:00	12	0	0	0	0	0	0	0	0	0	0	X500
2016-10-03 08:35:00	12	0	0	0	0	0	0	0	0	0	0	X500
2016-10-03 09:35:00	12	0	0	0	0	0	0	0	0	0	0	X500
2016-10-03 10:35:00	12	0	0	0	0	0	0	0	0	0	0	X500
2016-10-03 11:35:00	12	0	0	0	0	0	0	0	0	0	0	X500
2016-10-03 12:35:00	12	0	0	0	0	0	0	0	0	0	0	X500
2016-10-03 13:35:00	12	0	0	0	0	0	0	0	0	0	0	X500
2016-10-03 14:35:00	12	0	0	0	0	0	0	0	0	0	0	X500
2016-10-03 15:35:00	12	0	0	0	0	0	0	0	0	0	0	X500
2016-10-03 16:35:00	9	0	0	0	0	0	0	0	2	1	0	X500
2016-10-03 17:35:00	8	1	2	1	0	0	0	0	0	0	0	X500
2016-10-03 18:35:00	12	0	0	0	0	0	0	0	0	0	0	X500
2016-10-03 19:35:00	10	0	0	0	1	0	0	0	0	0	1	X500
2016-10-03 20:35:00	12	0	0	0	0	0	0	0	0	0	0	X500
2016-10-03 21:35:00	12	0	0	0	0	0	0	0	0	0	0	X500
2016-10-03 22:35:00	12	0	0	0	0	0	0	0	0	0	0	X500
2016-10-03 23:35:00	12	0	0	0	0	0	0	0	0	0	0	X500
2016-10-04 00:35:00	12	0	0	0	0	0	0	0	0	0	0	X500
2016-10-04 01:35:00	12	0	0	0	0	0	0	0	0	0	0	X500
2016-10-04 02:35:00	12	0	0	0	0	0	0	0	0	0	0	X500
2016-10-04 03:35:00	10	0	2	0	0	0	0	0	0	0	0	X500
2016-10-04 04:35:00	10	1	1	0	0	0	0	0	0	0	0	X500
2016-10-04 05:35:00	12	0	0	0	0	0	0	0	0	0	0	X500
2016-10-04 06:35:00	12	0	0	0	0	0	0	0	0	0	0	X500
2016-10-04 07:35:00	12	0	0	0	0	0	0	0	0	0	0	X500
2016-10-04 08:35:00	12	0	0	0	0	0	0	0	0	0	0	X500
2016-10-04 09:35:00	12	0	0	0	0	0	0	0	0	0	0	X500
2016-10-04 10:35:00	12	0	0	0	0	0	0	0	0	0	0	X500
2016-10-04 11:35:00	12	0	0	0	0	0	0	0	0	0	0	X500
2016-10-04 12:35:00	12	0	0	0	0	0	0	0	0	0	0	X500
2016-10-04 13:35:00	12	0	0	0	0	0	0	0	0	0	0	X500
2016-10-04 14:35:00	12	0	0	0	0	0	0	0	0	0	0	X500
2016-10-04 15:35:00	12	0	0	0	0	0	0	0	0	0	0	X500
2016-10-04 16:35:00	9	0	1	1	0	0	0	0	0	1	0	X500
2016-10-04 17:35:00	10	0	0	1	1	0	0	0	0	0	0	X500
2016-10-04 18:35:00	12	0	0	0	0	0	0	0	0	0	0	X500
2016-10-04 19:35:00	12	0	0	0	0	0	0	0	0	0	0	X500
2016-10-04 20:35:00	12	0	0	0	0	0	0	0	0	0	0	X500
2016-10-04 21:35:00	12	0	0	0	0	0	0	0	0	0	0	X500
2016-10-04 22:35:00	12	0	0	0	0	0	0	0	0	0	0	X500
2016-10-04 23:35:00	12	0	0	0	0	0	0	0	0	0	0	X500
2016-10-05 00:35:00	12	0	0	0	0	0	0	0	0	0	0	X500
2016-10-05 01:35:00	12	0	0	0	0	0	0	0	0	0	0	X500
2016-10-05 02:35:00	12	0	0	0	0	0	0	0	0	0	0	X500
2016-10-05 03:35:00	11	1	0	0	0	0	0	0	0	0	0	X500
2016-10-05 04:35:00	11	0	1	0	0	0	0	0	0	0	0	X500
2016-10-05 05:35:00	12	0	0	0	0	0	0	0	0	0	0	X500
2016-10-05 06:35:00	12	0	0	0	0	0	0	0	0	0	0	X500
2016-10-05 07:35:00	12	0	0	0	0	0	0	0	0	0	0	X500
2016-10-05 08:35:00	12	0	0	0	0	0	0	0	0	0	0	X500
2016-10-05 09:35:00	12	0	0	0	0	0	0	0	0	0	0	X500
2016-10-05 10:35:00	12	0	0	0	0	0	0	0	0	0	0	X500
2016-10-05 11:35:00	12	0	0	0	0	0	0	0	0	0	0	X500
2016-10-05 12:35:00	12	0	0	0	0	0	0	0	0	0	0	X500
2016-10-05 13:35:00	12	0	0	0	0	0	0	0	0	0	0	X500
2016-10-05 14:35:00	12	0	0	0	0	0	0	0	0	0	0	X500
2016-10-05 15:35:00	12	0	0	0	0	0	0	0	0	0	0	X500
2016-10-05 16:35:00	9	1	1	1	0	0	0	0	0	0	0	X500
2016-10-05 17:35:00	9	2	0	1	0	0	0	0	0	0	0	X500
2016-10-05 18:35:00	12	0	0	0	0	0	0	0	0	0	0	X500
[truncated: 63,762 more rows]
